# Supplementary material for: Aza-aromatic polycycles based on triphenylene and acridine or acridone: synthesis and properties
Source: Royal Society of Chemistry journal article supplement (doi:10.1039/d1nj02630e), 2021-01-01
Supplement: d1nj02630e1.pdf [file d1nj02630e1.pdf]

## Supporting Information

### Aza-aromatic polycycles based on triphenylene and acridine or acridone: synthesis and properties

Salima Bouarfa,<sup>a,b</sup> Philippe Jéhan,<sup>c</sup> William Erb,<sup>a</sup> Olivier Mongin,<sup>a</sup> François-Hugues Porée,<sup>a</sup>  
Thierry Roisnel,<sup>a</sup> Ghenia Bentabed-Ababsa,<sup>b</sup> Nicolas Le Yondre\*<sup>c</sup> and Florence Mongin\*<sup>c</sup>

New Journal of Chemistry

<sup>a</sup> *Univ Rennes, CNRS, ISCR (Institut des Sciences Chimiques de Rennes) - UMR 6226,  
F-35000 Rennes, France*

<sup>b</sup> *Laboratoire de Synthèse Organique Appliquée, Faculté des Sciences Exactes et Appliquées,  
Université d'Oran 1 Ahmed Ben Bella, BP 1524 El M'Naouer, 31000 Oran, Algeria*

<sup>c</sup> *Univ Rennes, CNRS, ScanMat - UMS 2001, Centre Régional de Mesures Physiques de l'Ouest -  
CRMPO, F-35000, Rennes, France*

E-mails: nicolas.leyondre@univ-rennes1.fr, florence.mongin@univ-rennes1.fr

#### Table of Contents

|                                                                                                                                                                                   |        |
|-----------------------------------------------------------------------------------------------------------------------------------------------------------------------------------|--------|
| General information and crystallographic details                                                                                                                                  | p. S2  |
| Experimental procedures and analyses of intermediate compounds                                                                                                                    | p. S3  |
| NMR spectra of compounds <b>1</b> , <b>2</b> , <b>3a-c</b> , <b>4a-c</b> , <b>5</b> , <b>6</b> , <b>7</b> , <b>8</b> , <b>9</b> , <b>10</b> , <b>11</b> , <b>12</b> and <b>13</b> | p. S7  |
| Highest occupied Hückel molecular orbitals (HOMO) of the compounds <b>A</b> , <b>B</b> , <b>C</b> , <b>1</b> , <b>3a-c</b> , <b>5</b> , <b>10</b> and <b>12</b>                   | p. S32 |
| Qualitative evaluation of <b>8</b> and <b>9</b> as matrices for MALDI-MS                                                                                                          | p. S37 |
| References and notes                                                                                                                                                              | p. S45 |

## General information

Column chromatography separations were achieved on silica gel (40-63  $\mu\text{m}$ ). Melting points were measured on a Kofler apparatus. IR spectra were taken on a Perkin-Elmer Spectrum 100 spectrometer.  $^1\text{H}$  and  $^{13}\text{C}$  Nuclear Magnetic Resonance (NMR) spectra were recorded either on a Bruker Avance III spectrometer at 300 MHz and 75 MHz respectively, or on a Bruker Avance III HD spectrometer at 500 MHz and 126 MHz respectively.  $^1\text{H}$  chemical shifts ( $\delta$ ) are given in ppm relative to the solvent residual peak and  $^{13}\text{C}$  chemical shifts are relative to the central peak of the solvent signal.<sup>1</sup> Unless otherwise specified, mass spectra (HRMS) were recorded on an Ultraflex III apparatus in Matrix Assisted Laser Desorption (MALDI) positive mode (Matrix: *trans*-2-[3-(4-*tert*-butylphenyl)-2-methyl-2-propenylidene]malononitrile, DCTB).

Unless otherwise stated, all reagents are commercially available and used as received. After distillation, dimethylsulfoxide and dimethylformamide were stored on 3Å molecular sieves. Activated copper,<sup>2</sup> 2-iodotriphenylene,<sup>3</sup> 2-aminobenzaldehyde<sup>4</sup> and 9-aminoacridine (9AA)<sup>5</sup> were prepared as reported previously. All reactions involving moisture-sensitive reactants were performed under argon atmosphere. Before use,  $\text{CDCl}_3$  was neutralized by passing through a short plug of anhydrous, activated basic alumina.

## Crystallographic details

The X-ray diffraction data of the compounds **2** and **8** were collected at 150(2) K on a D8 VENTURE Bruker AXS diffractometer equipped with a (CMOS) PHOTON 100 detector by using Mo-K $\alpha$  radiation ( $\lambda = 0.71073$  Å, multilayered monochromator). The structures were solved by dual-space algorithm using the *SHELXT* program,<sup>6</sup> and then refined with full-matrix least-square methods based on  $F^2$  (*SHELXL*).<sup>7</sup> All non-hydrogen atoms were refined with anisotropic atomic displacement parameters. H atoms were finally included in their calculated positions and treated as riding on their parent atom with constrained thermal parameters. The molecular diagrams were generated by ORTEP-3 (version 2.02).<sup>8</sup>

## Experimental procedures and analyses of the compounds

### Synthesis of the compounds 1 and 3 (General procedure).

They were prepared under an argon atmosphere by adapting a procedure reported previously.<sup>9</sup> To a solution of either 2-aminobenzaldehyde<sup>4</sup> (0.12 g, 1.0 mmol), or the commercial 2-aminophenone (1.0 mmol), and 2-iodotriphenylene<sup>3</sup> (0.35 g, 1.0 mmol) in degassed Bu<sub>2</sub>O (1 mL) were successively added activated Cu<sup>2</sup> (0.20 equiv, 13 mg, 0.20 mmol) and K<sub>2</sub>CO<sub>3</sub> (2 equiv, 0.29 g, 2.0 mmol). The mixture was degassed and refluxed under argon for 12 h. During this time, activated Cu<sup>2</sup> (4 x 13 mg, 4 x 0.2 mmol) was added after 2, 4, 6 and 8 h of heating. After cooling to room temperature, the mixture was concentrated and purified as specified in the product description.

**2-(2-Triphenylenyl)aminobenzaldehyde (1).** It was prepared according to the general procedure by starting from 2-aminobenzaldehyde.<sup>4</sup> Purification by column chromatography on silica gel (eluent: petroleum ether-AcOEt 90:10; R<sub>f</sub> = 0.46) gave **1** in 86% yield (0.31 g) as a yellow solid: mp 182 °C; IR (ATR): 664, 717, 749, 802, 857, 869, 968, 998, 1042, 1052, 1117, 1150, 1185, 1199, 1241, 1319, 1400, 1432, 1452, 1492, 1509, 1581, 1605, 1652, 2751, 2850, 2920, 3053, 3282 cm<sup>-1</sup>; <sup>1</sup>H NMR (CDCl<sub>3</sub>) δ 6.88-6.93 (m, 1H), 7.44 (d, 2H, *J* = 3.4 Hz), 7.59-7.71 (m, 6H), 8.52-8.68 (m, 6H), 9.98 (s, 1H, CHO), 10.32 (br s, 1H, NH); <sup>13</sup>C NMR (CDCl<sub>3</sub>) δ 113.2 (CH), 116.5 (CH), 117.6 (CH), 119.8 (C), 122.7 (CH), 123.1 (CH), 123.4 (CH), 123.4 (CH), 123.5 (CH), 124.7 (CH), 126.5 (C), 126.9 (CH), 127.3 (CH), 127.4 (CH), 127.6 (CH), 129.3 (C), 129.4 (C), 129.7 (C), 130.2 (C), 131.1 (C), 135.8 (CH), 136.8 (CH), 138.9 (C), 147.7 (C), 194.4 (CH, CHO).

**Phenyl 2-(2-triphenylenyl)aminophenyl ketone (3a).** It was prepared according to the general procedure by starting from 2-aminobenzophenone (0.20 g). Purification by column chromatography on silica gel (eluent: petroleum ether-AcOEt 90:10; R<sub>f</sub> = 0.50) gave **3a** in 71% yield (0.31 g) as an orange solid: mp 100 °C; IR (ATR): 750, 804, 819, 855, 911, 939, 1001,

1028, 1050, 1075, 1108, 1154, 1246, 1317, 1448, 1490, 1509, 1569, 1599, 2919, 3062, 3277  $\text{cm}^{-1}$ ;  $^1\text{H}$  NMR ( $\text{CDCl}_3$ )  $\delta$  6.83 (t, 1H,  $J = 7.5$  Hz), 7.44 (td, 1H,  $J = 7.6$  and 1.4 Hz), 7.53-7.64 (m, 9H), 7.70 (dd, 1H,  $J = 8.0$  and 1.3 Hz), 7.89 (d, 2H,  $J = 6.7$  Hz), 8.49-8.59 (m, 6H), 10.55 (s, 1H, NH);  $^{13}\text{C}$  NMR ( $\text{CDCl}_3$ )  $\delta$  114.8 (CH), 114.9 (CH), 117.0 (CH), 120.2 (C), 121.6 (CH), 122.8 (CH), 123.1 (CH), 123.2 (CH), 123.2 (CH), 124.5 (CH), 125.6 (C), 126.5 (CH), 127.0 (CH), 127.1 (CH), 127.2 (CH), 128.1 (2CH), 129.0 (C), 129.2 (C), 129.5 (2CH), 129.6 (C), 130.0 (C), 130.9 (C), 131.4 (CH), 134.3 (CH), 135.0 (CH), 139.5 (C), 139.7 (C), 147.6 (C), 199.0 (C, C=O).

**5-Chloro-2-(2-triphenylenyl)aminophenyl phenyl ketone (3b).** It was prepared according to the general procedure by starting from 2-amino-5-chlorobenzophenone (0.23 g) Purification by column chromatography on silica gel (eluent: petroleum ether-AcOEt 90:10;  $R_f = 0.50$ ) gave **3b** in 91% yield (0.40 g) as an orange powder: mp 160  $^\circ\text{C}$ ; IR (ATR): 657, 699, 719, 753, 772, 807, 824, 869, 916, 949, 1102, 1118, 1148, 1178, 1236, 1319, 1408, 1444, 1490, 1511, 1571, 1612, 2167, 3057  $\text{cm}^{-1}$ ;  $^1\text{H}$  NMR ( $\text{CDCl}_3$ )  $\delta$  7.33 (dd, 1H,  $J = 9.0$  and 2.5 Hz, H4), 7.48 (d, 1H,  $J = 9.1$  Hz, H3), 7.51-7.67 (m, 9H), 7.77-7.80 (m, 2H), 8.44 (d, 1H,  $J = 2.1$  Hz, H6), 8.48-8.63 (m, 5H), 10.26 (s, 1H, NH);  $^{13}\text{C}$  NMR ( $\text{CDCl}_3$ )  $\delta$  115.6 (CH), 116.8 (CH), 121.3 (C), 121.7 (C), 122.1 (CH), 123.1 (CH), 123.4 (CH), 123.5 (CH), 123.5 (CH), 125.0 (CH), 126.3 (C), 126.9 (CH), 127.4 (CH), 127.5 (CH), 127.7 (CH), 128.6 (2CH), 129.4 (C), 129.7 (2CH), 129.8 (C), 130.3 (C), 131.3 (C), 132.1 (CH), 133.90 (CH), 134.3 (CH), 139.1 (C), 139.5 (C), 146.5 (C), 198.2 (C, C=O), 1C not seen.

**2-(2-Triphenylenyl)aminoacetophenone (3c).** It was prepared according to the general procedure by starting from 2-aminoacetophenone (0.14 g). Purification by column chromatography on silica gel (eluent: petroleum ether-AcOEt 90:10;  $R_f = 0.475$ ) gave **3c** in 66% yield (0.25 g) as a yellow powder: mp 174  $^\circ\text{C}$ ; IR (ATR): 657, 700, 717, 751, 770, 807, 869, 949, 1119, 1149, 1177, 1236, 1320, 1408, 1430, 1490, 1513, 1571, 1612, 3057  $\text{cm}^{-1}$ ;  $^1\text{H}$

NMR (CDCl<sub>3</sub>) δ 2.70 (s, 3H, Me), 6.81 (ddd, 1H, *J* = 8.1, 6.9 and 1.2 Hz), 7.37 (ddd, 1H, *J* = 8.5, 6.9 and 1.5 Hz), 7.46 (dd, 1H, *J* = 8.5 and 1.0 Hz), 7.57 (dd, 1H, *J* = 8.8 and 2.2 Hz), 7.60-7.69 (m, 4H), 7.88 (dd, 1H, *J* = 8.1 and 1.4 Hz), 8.48 (d, 1H, *J* = 2.2 Hz), 8.52-8.66 (m, 5H), 10.85 (s, 1H, NH); <sup>13</sup>C NMR (CDCl<sub>3</sub>) δ 28.3 (CH<sub>3</sub>), 114.6 (CH), 116.4 (CH), 117.1 (CH), 119.6 (C), 122.8 (CH), 123.1 (CH), 123.4 (CH), 123.5 (CH), 123.5 (CH), 124.7 (CH), 126.2 (C), 126.8 (CH), 127.3 (CH), 127.4 (CH), 127.5 (CH), 129.4 (C), 129.5 (C), 129.8 (C), 130.2 (C), 131.1 (C), 132.7 (CH), 134.8 (CH), 139.7 (C), 147.8 (C), 201.5 (C, C=O).

**Ethyl 2-(2-triphenylenyl)aminobenzoate (5).** It was prepared under an argon atmosphere by adapting a procedure reported previously.<sup>9</sup> To commercial ethyl anthranilate (ethyl 2-aminobenzoate; 0.17 g, 1.0 mmol) and 2-iodotriphenylene<sup>3</sup> (0.35 g, 1.0 mmol) in degassed Bu<sub>2</sub>O (1 mL) were successively added activated Cu<sup>2</sup> (0.20 equiv, 13 mg, 0.20 mmol) and K<sub>2</sub>CO<sub>3</sub> (2 equiv, 0.29 g, 2.0 mmol). The mixture was degassed and refluxed under argon for 12 h. During this time, activated Cu<sup>2</sup> (4 x 13 mg, 4 x 0.2 mmol) was added after 2, 4, 6 and 8 h of heating. After cooling to room temperature, the mixture was concentrated. Purification by column chromatography on silica gel (eluent: petroleum ether-AcOEt 98:2; R<sub>f</sub> = 0.575) gave **5** in 88% yield (0.34 g) as a yellow solid: mp 135 °C; IR (ATR): 700, 718, 749, 813, 857, 872, 944, 1025, 1050, 1083, 1148, 1162, 1235, 1246, 1316, 1368, 1395, 1442, 1453, 1491, 1513, 1581, 1602, 1617, 1671, 2979, 3313 cm<sup>-1</sup>; <sup>1</sup>H NMR (CDCl<sub>3</sub>) δ 1.47 (t, 3H, *J* = 7.1 Hz), 4.44 (q, 2H, *J* = 7.1 Hz), 6.84 (t, 1H, *J* = 7.5 Hz), 7.40 (td, 1H, *J* = 7.8 and 1.4 Hz), 7.49 (d, 1H, *J* = 8.4 Hz), 7.56 (dd, 1H, *J* = 8.8 and 2.1 Hz), 7.59-7.67 (m, 4H), 8.09 (dd, 1H, *J* = 8.0 and 1.3 Hz), 8.45-8.64 (m, 6H), 9.87 (br s, 1H, NH); <sup>13</sup>C NMR (CDCl<sub>3</sub>) δ 14.5 (CH<sub>3</sub>), 60.9 (CH<sub>2</sub>), 112.8 (C), 114.4 (CH), 115.4 (CH), 117.6 (CH), 122.1 (CH), 123.0 (CH), 123.3 (CH), 123.4 (CH), 123.4 (CH), 124.6 (CH), 125.7 (C), 126.6 (CH), 127.2 (CH), 127.3 (CH), 127.4 (CH), 129.2 (C), 129.4 (C), 129.8 (C), 130.2 (C), 131.1 (C), 131.9 (CH), 134.2 (CH), 140.1 (C), 147.7 (C), 168.7 (C).

**2-(2-Triphenylenyl)aminobenzoic acid (6)** was prepared by adapting a procedure reported previously.<sup>10</sup> Ethyl 2-(2-triphenylenyl)aminobenzoate (**5**; 0.39 g, 1.0 mmol) was suspended in acetone (10 mL) and treated by 10 mL of a 5% aqueous solution of sodium hydroxide (12 mmol). The reaction mixture was refluxed for 16 h and cooled to room temperature. The solvent was removed under reduced pressure. CH<sub>2</sub>Cl<sub>2</sub> (30 mL) and water (20 mL) were added to the residue. The aqueous phase was collected and acidified until pH = 1 by addition at 0 °C of concentrated hydrochloric acid. The obtained precipitate was dried under vacuum at 100 °C for 2 h and used in the next step without further purification. Compound **6** was obtained in a quantitative yield (0.36 g) as a beige solid: mp > 260 °C; IR (ATR): 719, 745, 760, 882, 919, 1043, 1162, 1252, 1319, 1338, 1434, 1450, 1491, 1509, 1570, 1617, 1664, 2567, 2839, 3342 cm<sup>-1</sup>; <sup>1</sup>H NMR ((CD<sub>3</sub>)<sub>2</sub>SO) δ 6.85-6.90 (m, 1H), 7.47 (d, 2H, *J* = 3.7 Hz), 7.62-7.74 (m, 5H), 7.98 (d, 1H, *J* = 8.2 Hz), 8.59 (d, 1H, *J* = 1.8 Hz, H1'), 8.71-8.81 (m, 5H), 9.96 (br s, 1H, NH), 13.17 (br s, 1H, CO<sub>2</sub>H); <sup>13</sup>C NMR ((CD<sub>3</sub>)<sub>2</sub>SO) δ 113.5 (C), 114.2 (CH), 114.4 (CH), 118.0 (CH), 121.2 (CH), 123.1 (CH), 123.5 (CH), 123.5 (CH), 123.7 (CH), 124.6 (C), 125.0 (CH), 126.8 (CH), 127.5 (CH), 127.6 (CH), 127.7 (CH), 128.4 (C), 128.8 (C), 129.2 (C), 129.5 (C), 130.5 (C), 131.9 (CH), 134.2 (CH), 140.3 (C), 146.4 (C), 169.8 (C, C=O).

# NMR spectra

## 2-(2-Triphenylenyl)aminobenzaldehyde (1)

$^1\text{H}$  NMR (300 MHz,  $\text{CDCl}_3$ )

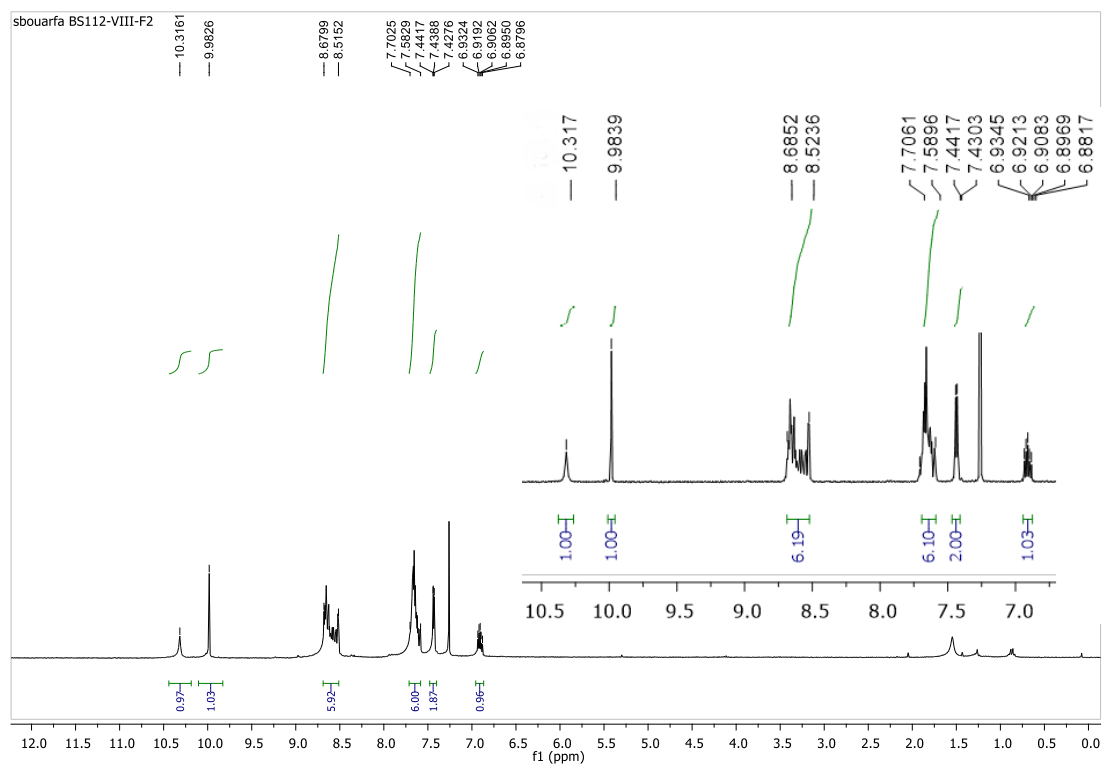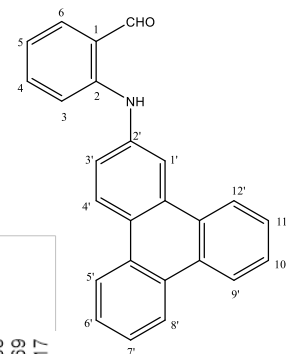

$^{13}\text{C}$  NMR (75 MHz,  $\text{CDCl}_3$ )

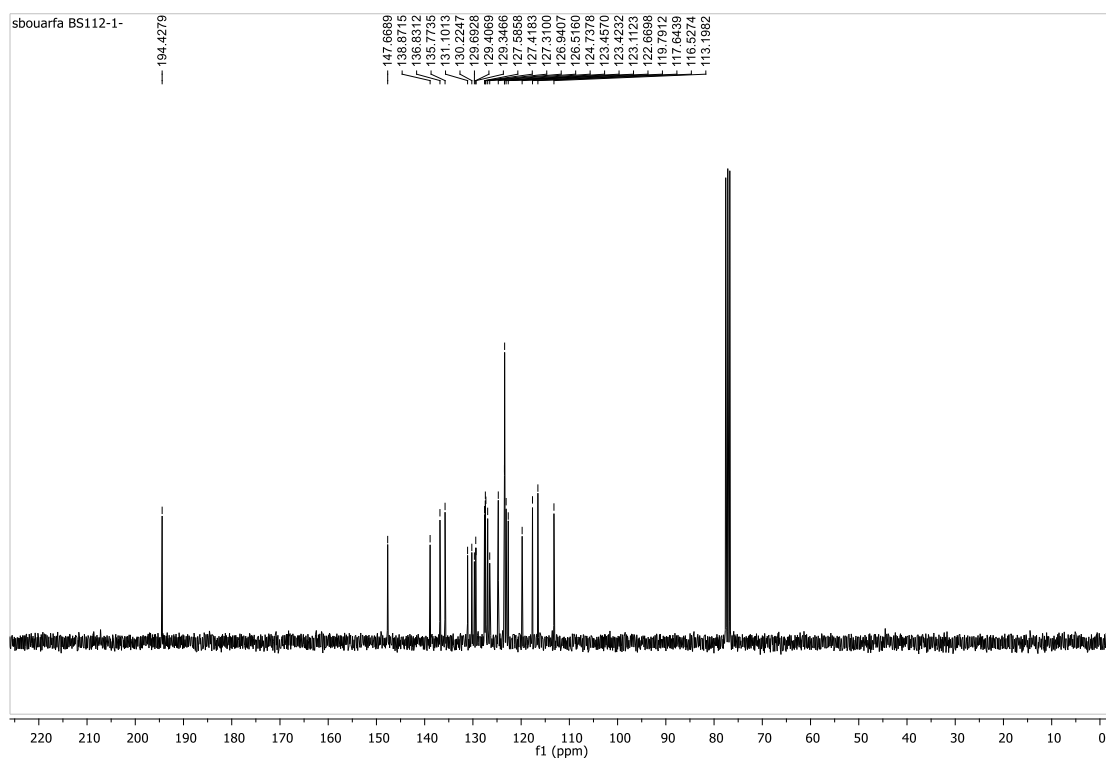

# Phenanthro[9,10-*a*]acridine (2)

<sup>1</sup>H NMR (500 MHz, CDCl<sub>3</sub>)

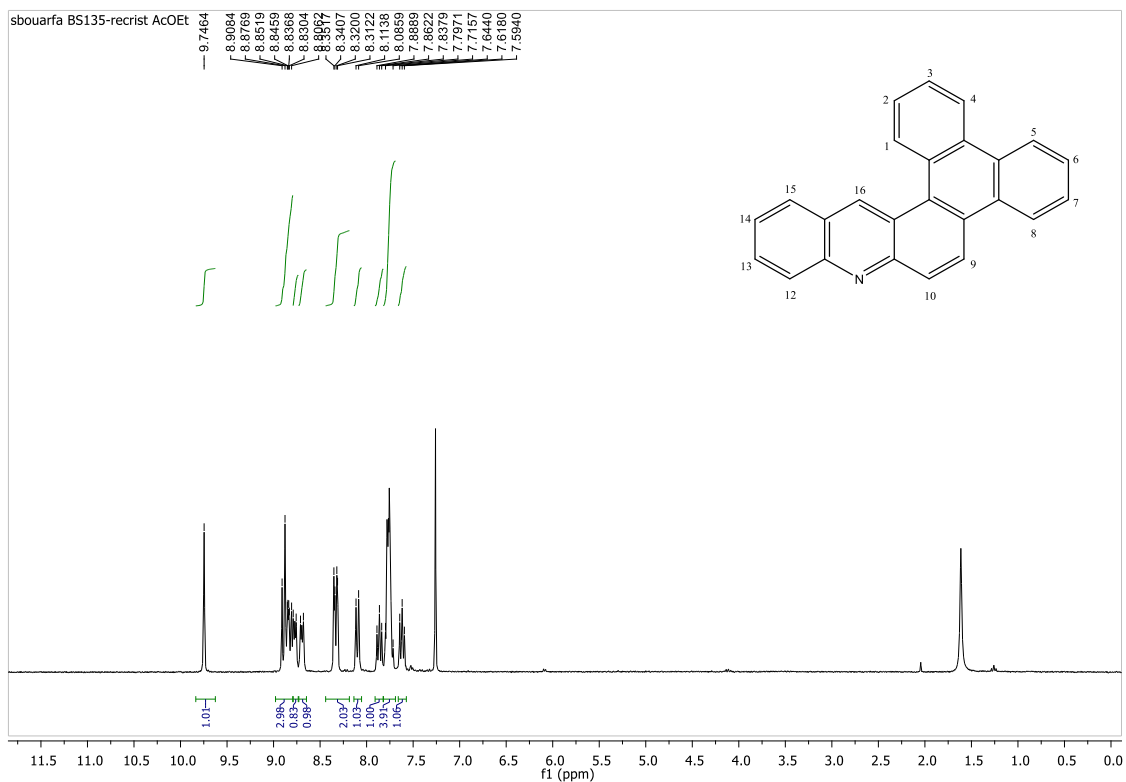

<sup>13</sup>C NMR (75 MHz, CDCl<sub>3</sub>)

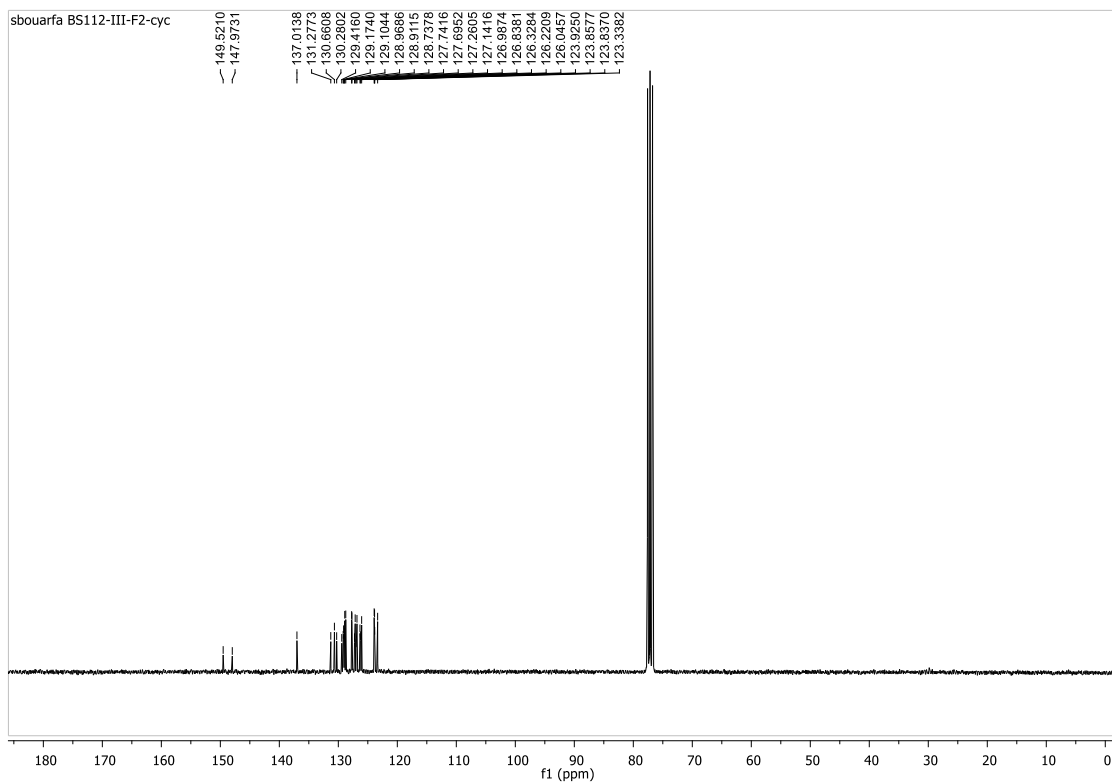



### COSY (500 MHz, CDCl<sub>3</sub>)

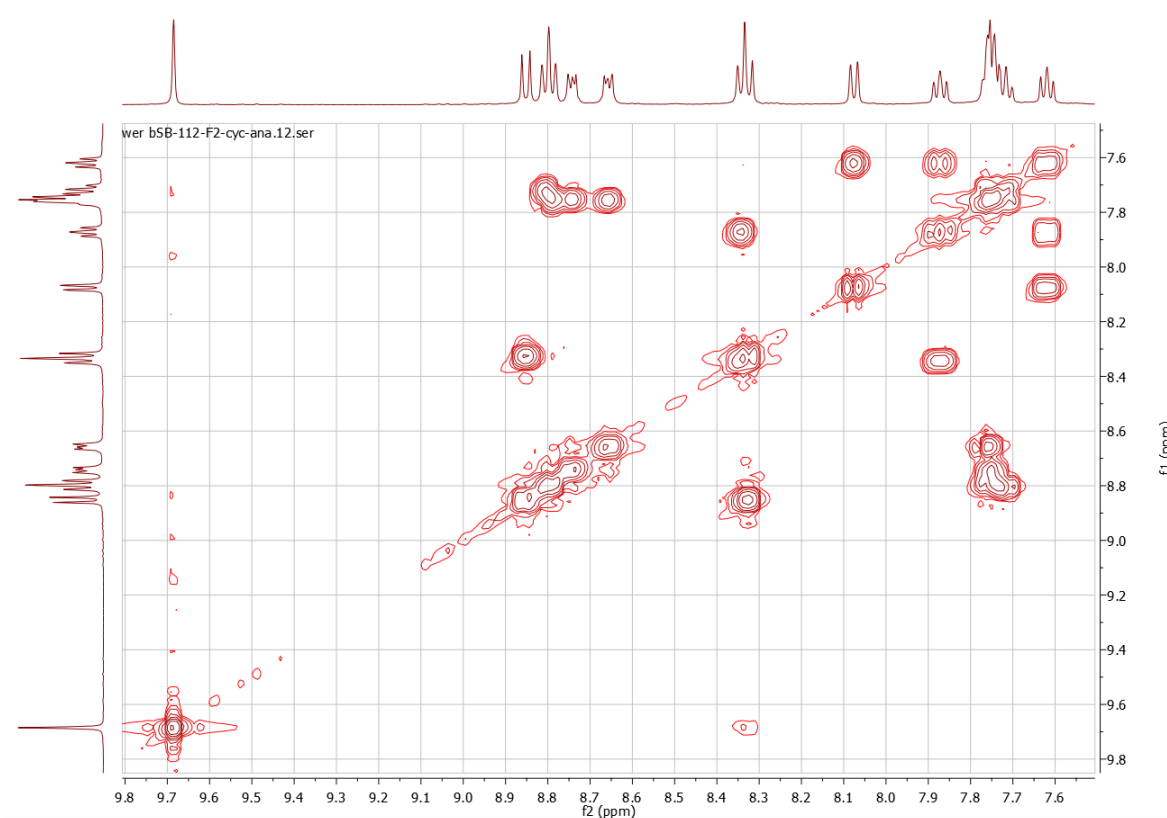

### HSQC (500 MHz, CDCl<sub>3</sub>)

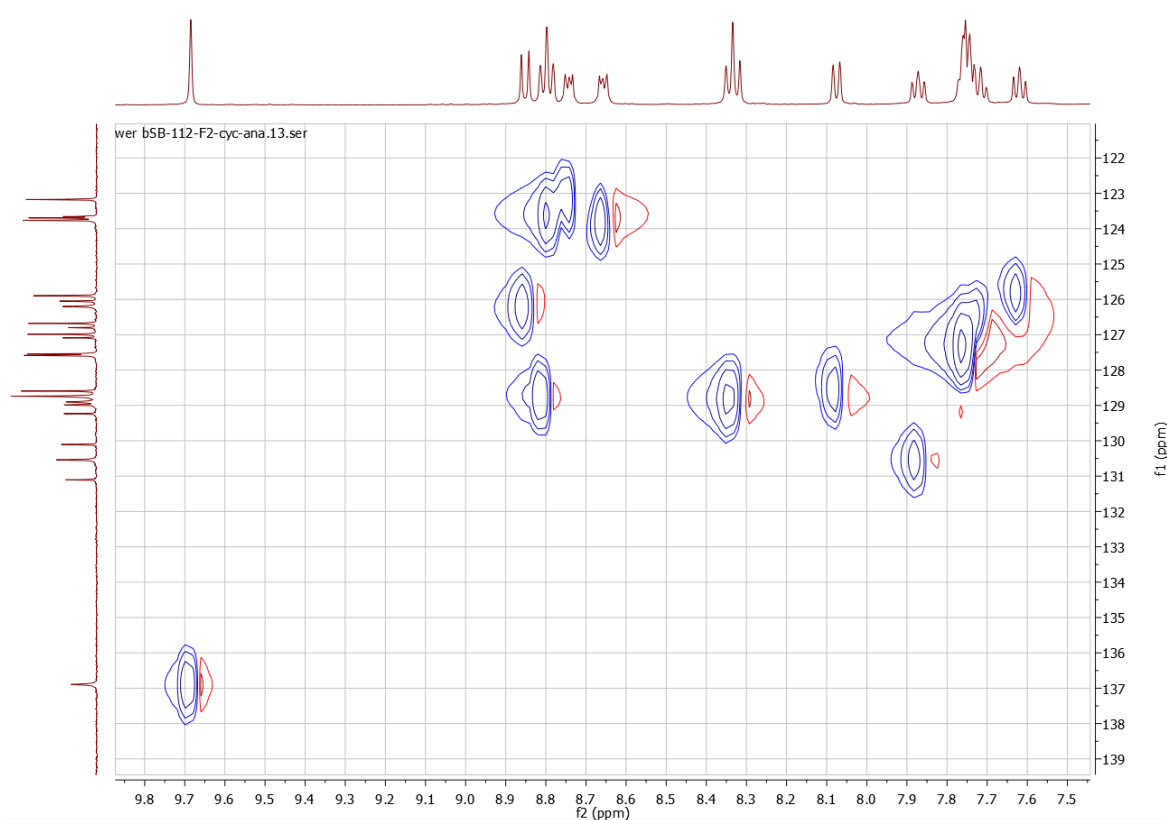

NOESY (500 MHz, CDCl<sub>3</sub>)

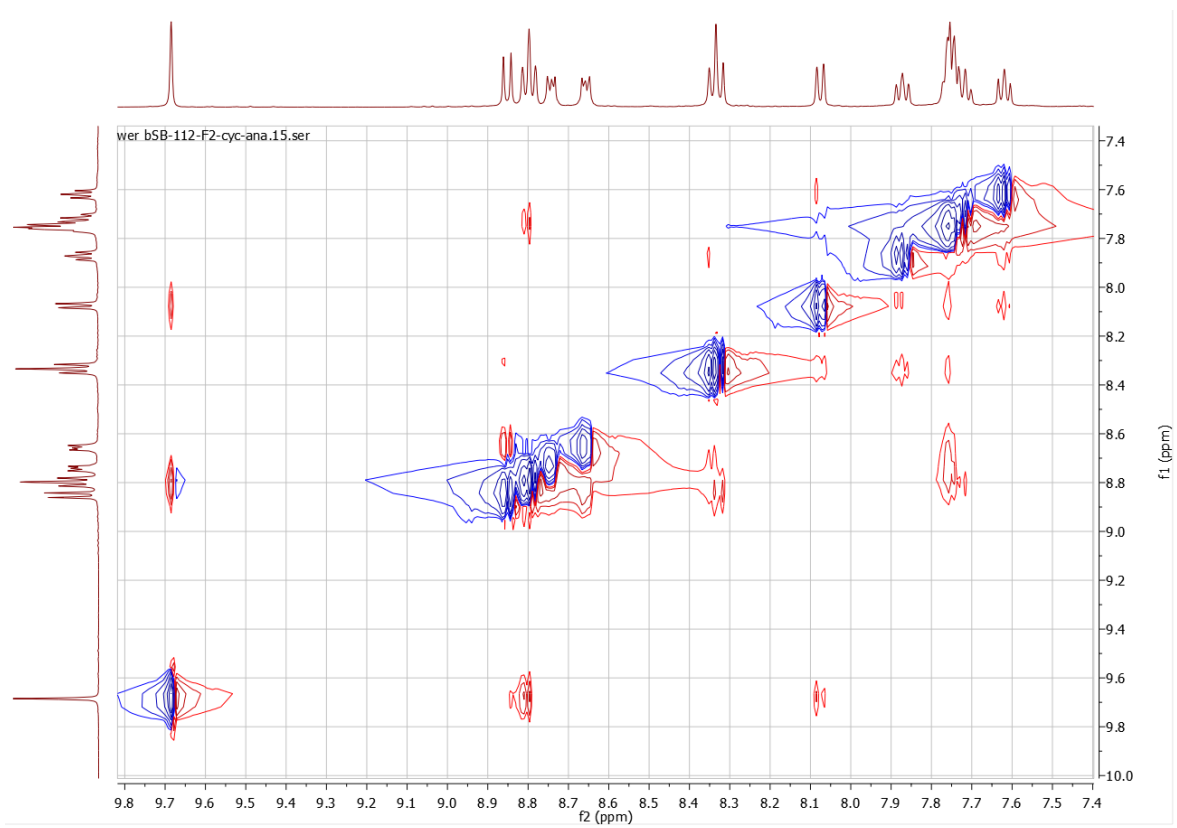

# Phenyl 2-(2-triphenylenyl)aminophenyl ketone (3a)

$^1\text{H}$  NMR (300 MHz,  $\text{CDCl}_3$ )

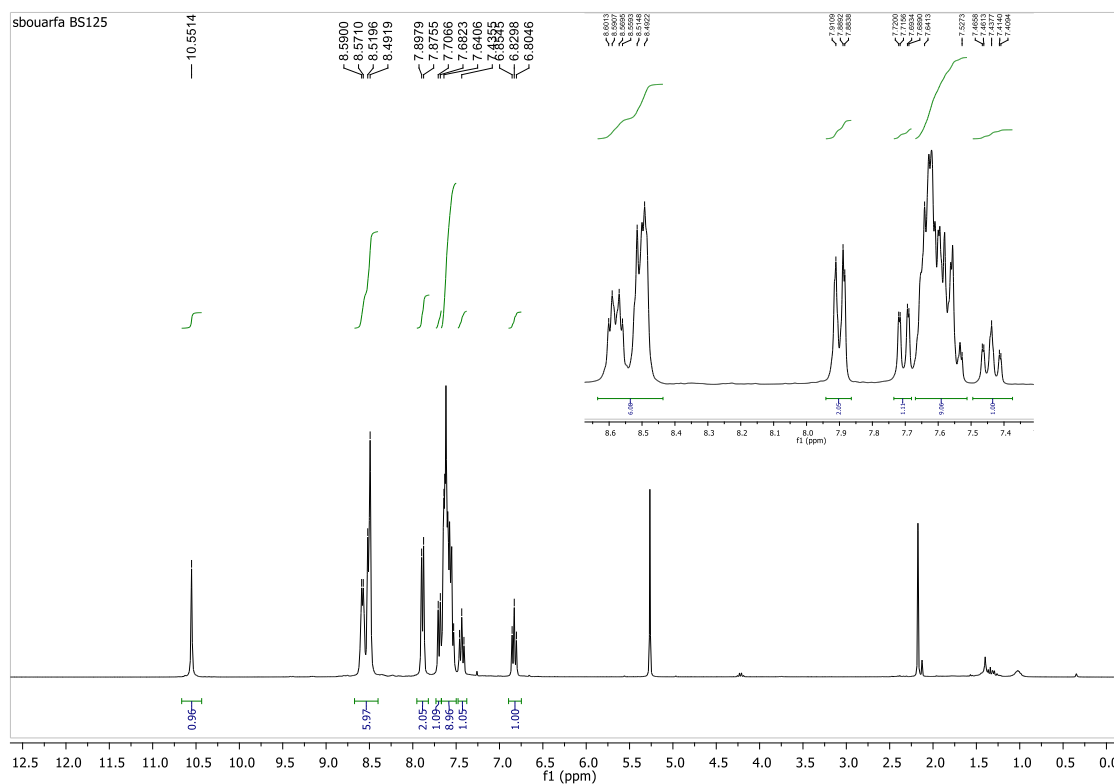

$^{13}\text{C}$  NMR (75 MHz,  $\text{CDCl}_3$ )

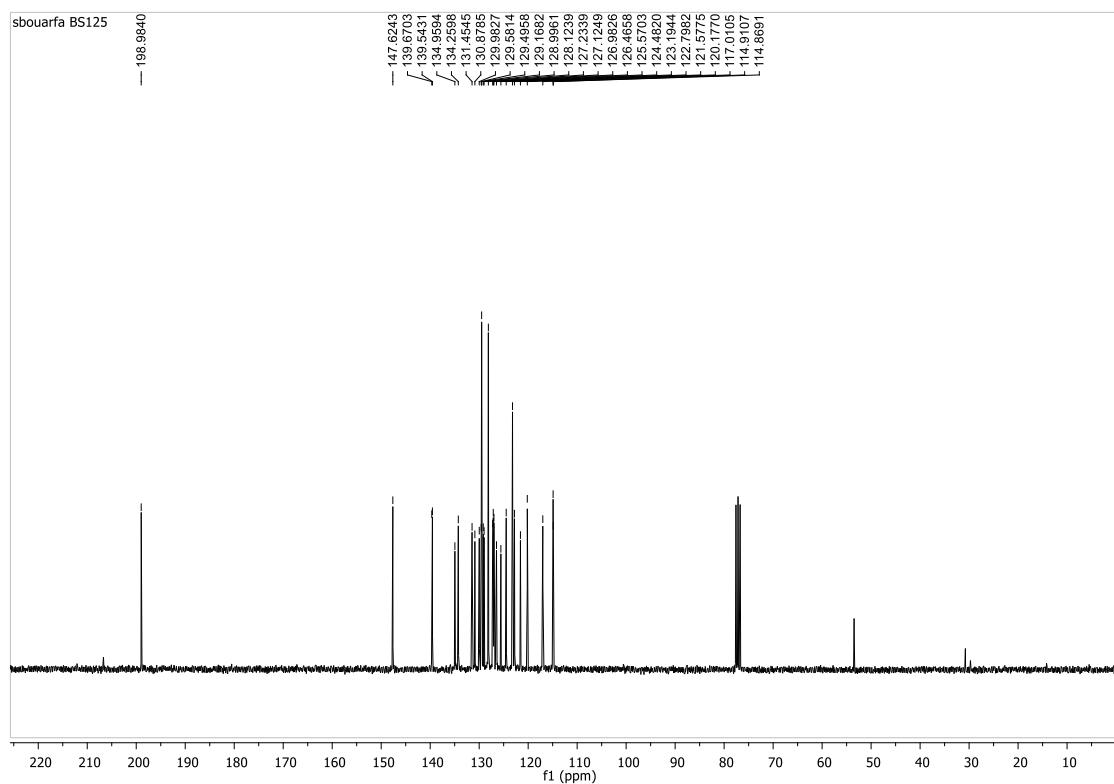

# 5-Chloro-2-(2-triphenylenyl)aminophenyl phenyl ketone (3b)

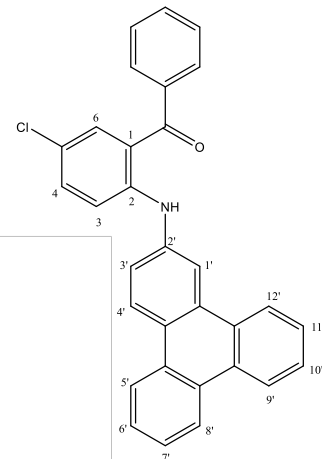

$^1\text{H}$  NMR (300 MHz,  $\text{CDCl}_3$ )

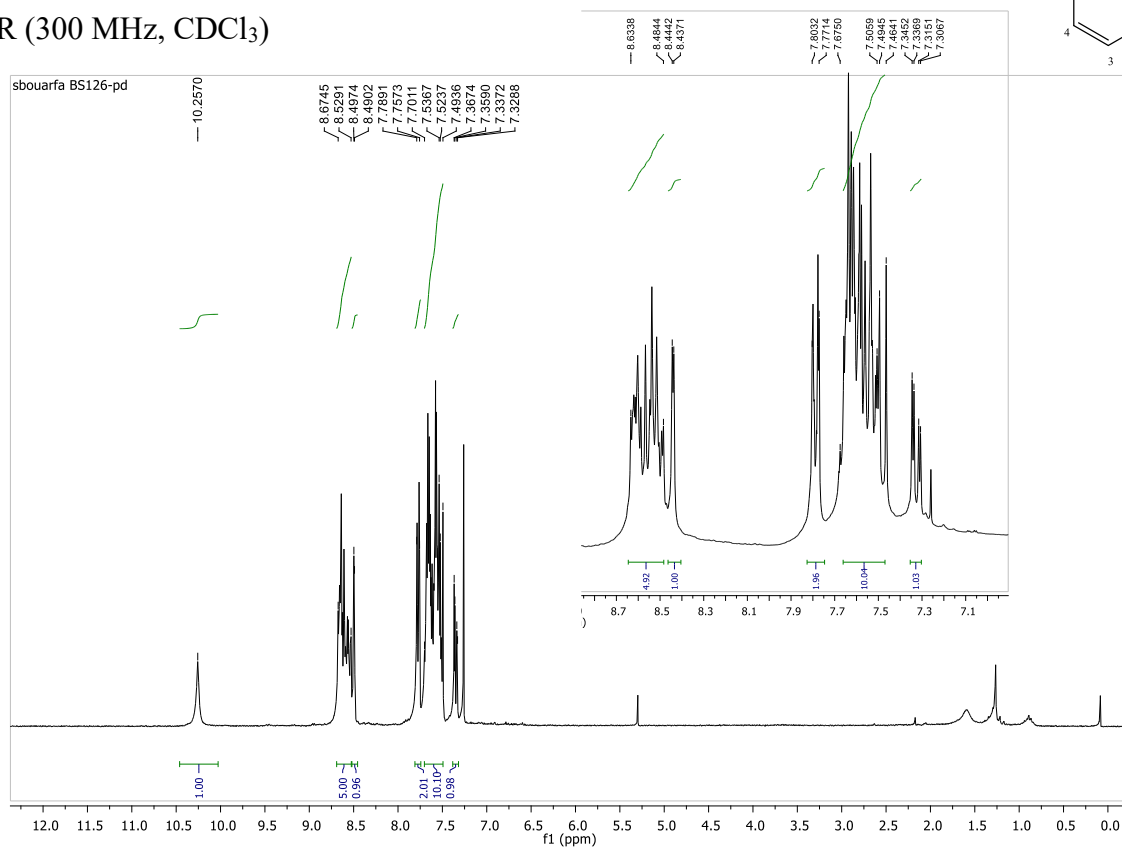

$^{13}\text{C}$  NMR (75 MHz,  $\text{CDCl}_3$ )

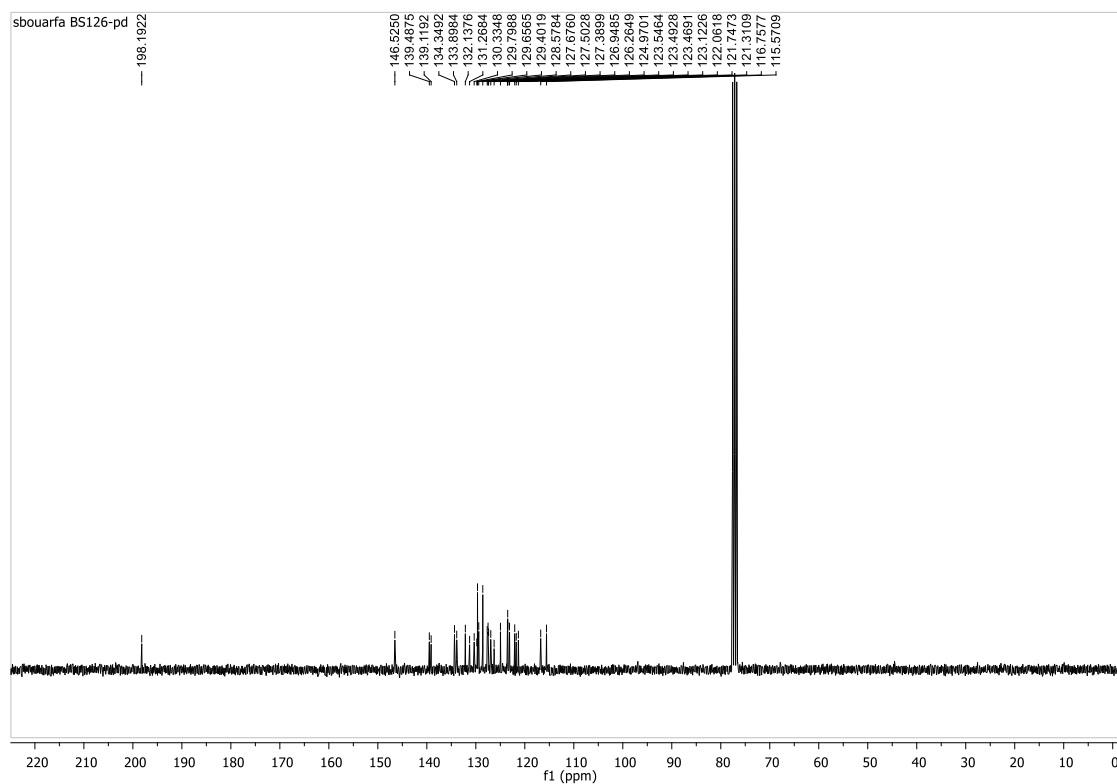

## 2-(2-Triphenylenyl)aminoacetophenone (3c)

$^1\text{H}$  NMR (300 MHz,  $\text{CDCl}_3$ )

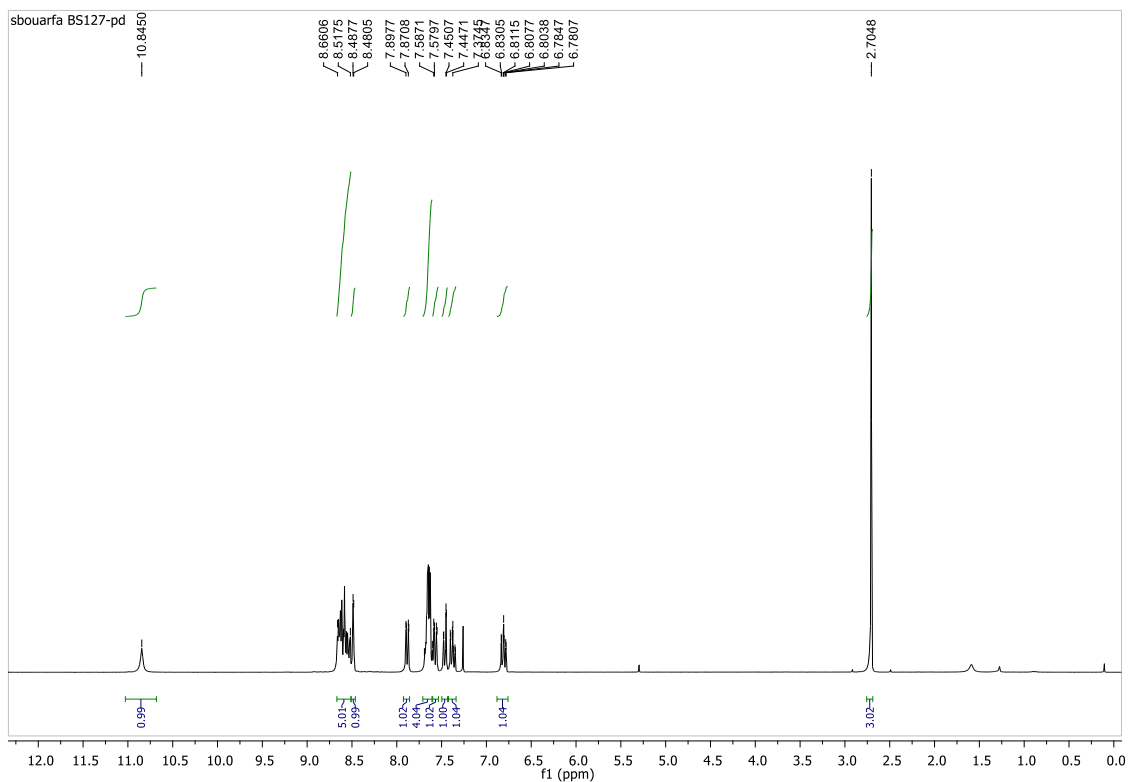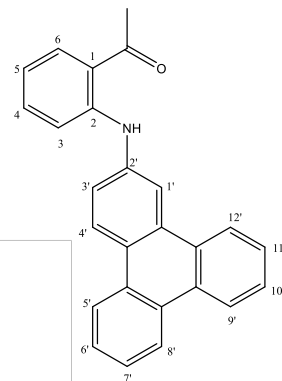

$^{13}\text{C}$  NMR (75 MHz,  $\text{CDCl}_3$ )

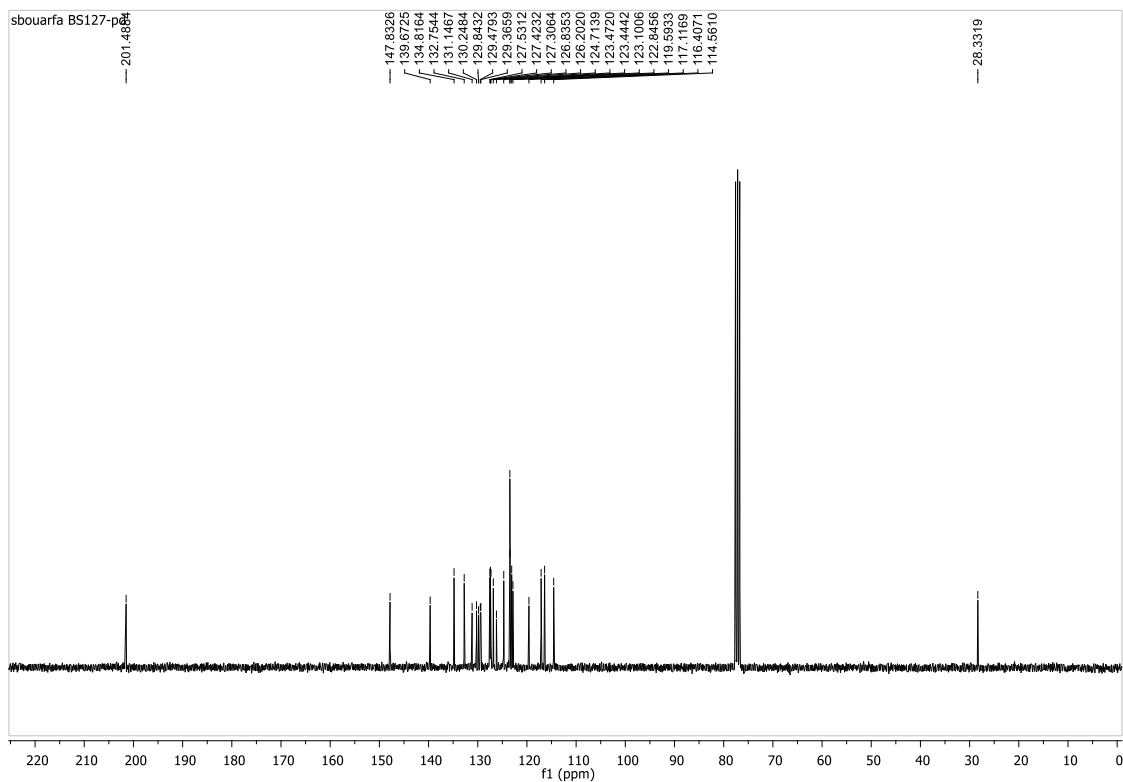

# 15-Phenylphenanthro[9,10-b]acridine (4a)

$^1\text{H}$  NMR (300 MHz,  $\text{CDCl}_3$ )

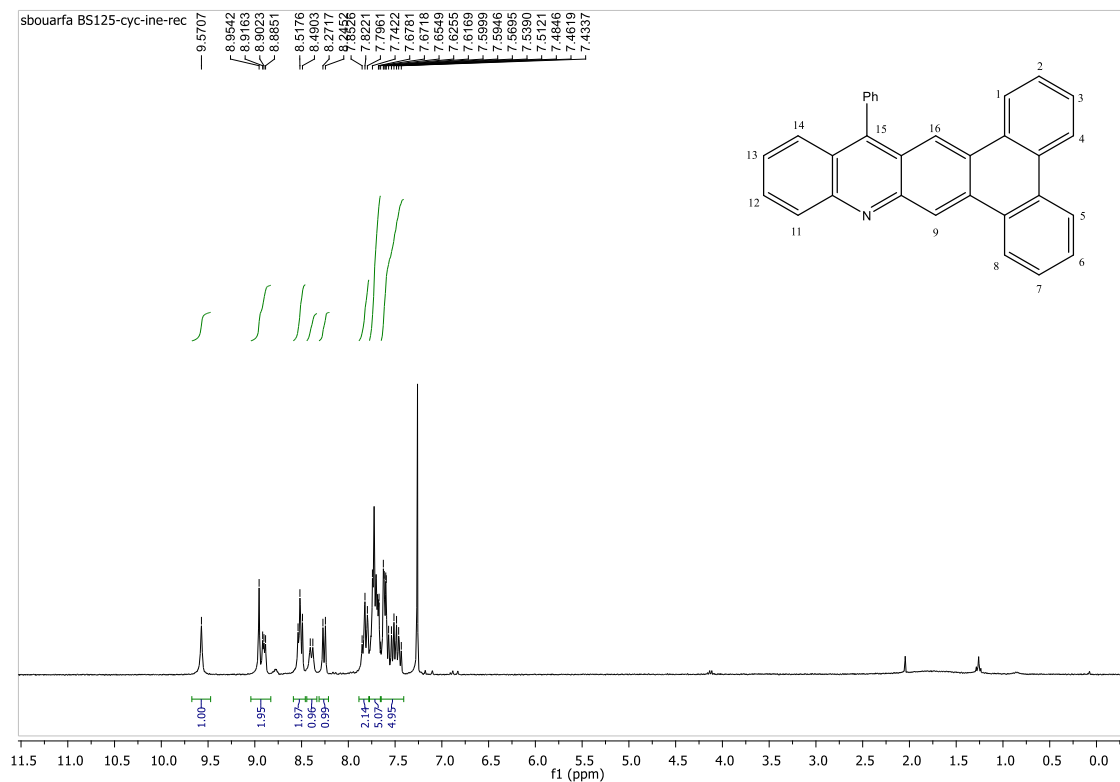

$^{13}\text{C}$  NMR (75 MHz,  $\text{CDCl}_3$ )

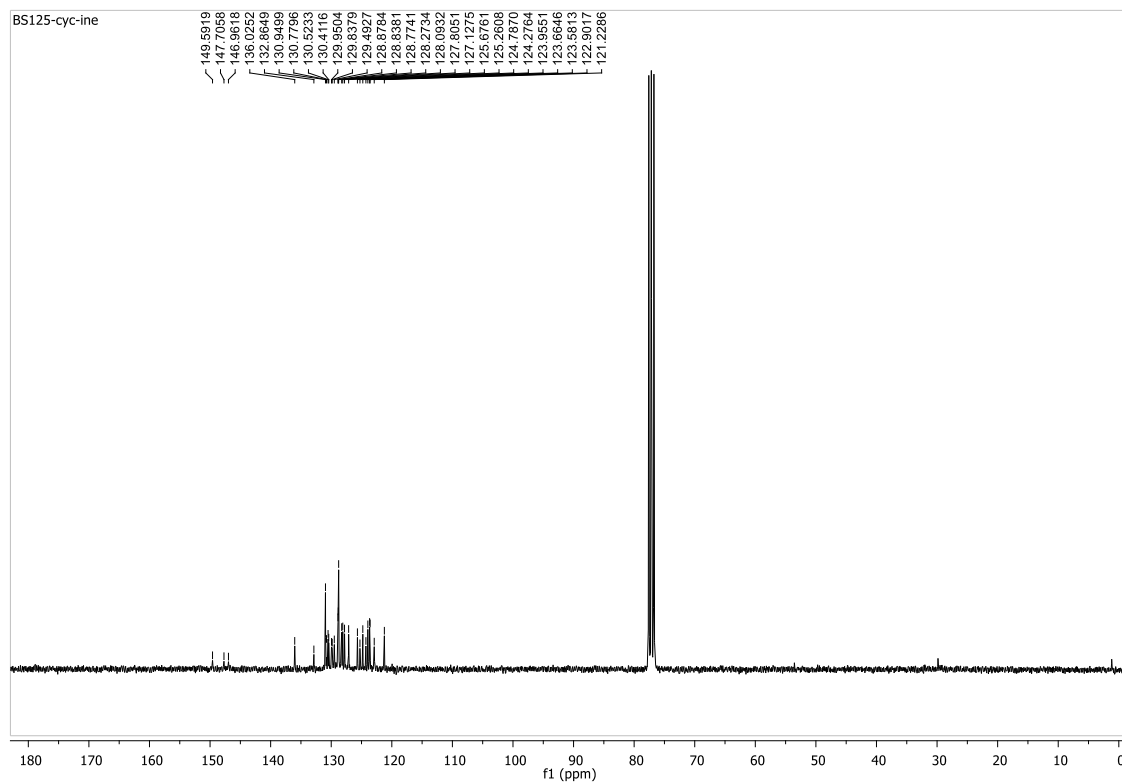

# 13-Chloro-15-phenylphenanthro[9,10-b]acridine (4b)

$^1\text{H}$  NMR (500 MHz,  $\text{CDCl}_3$ )

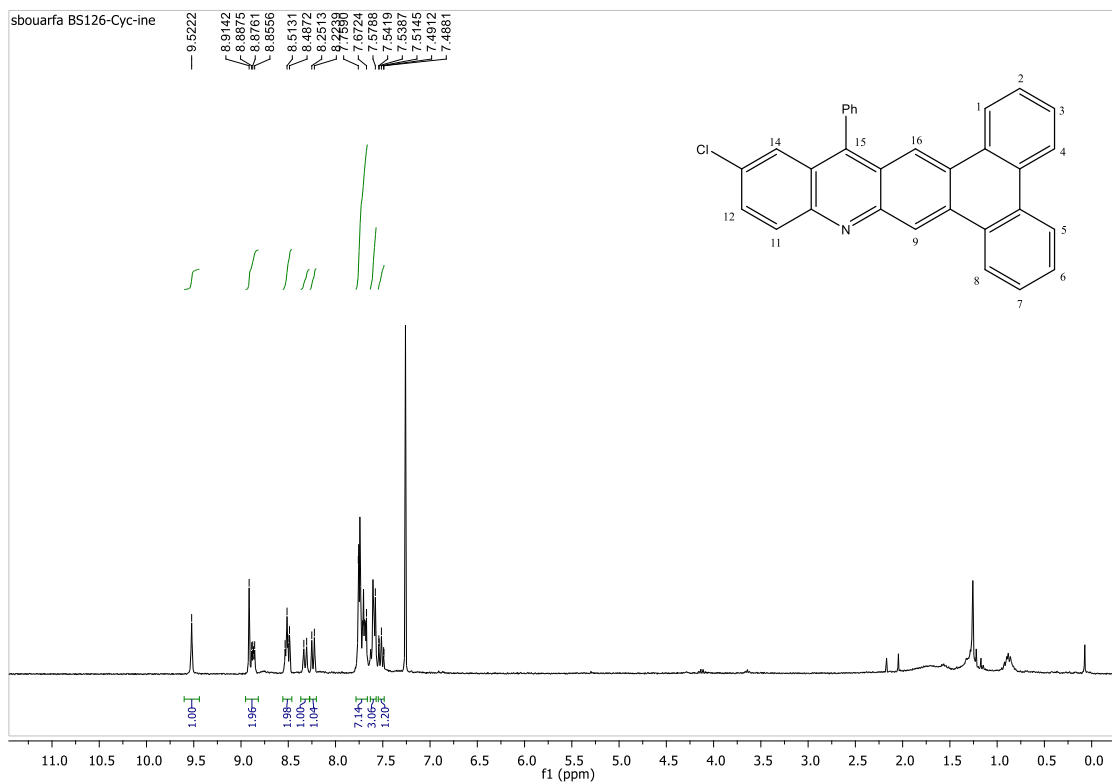

$^{13}\text{C}$  NMR (75 MHz,  $\text{CDCl}_3$ )

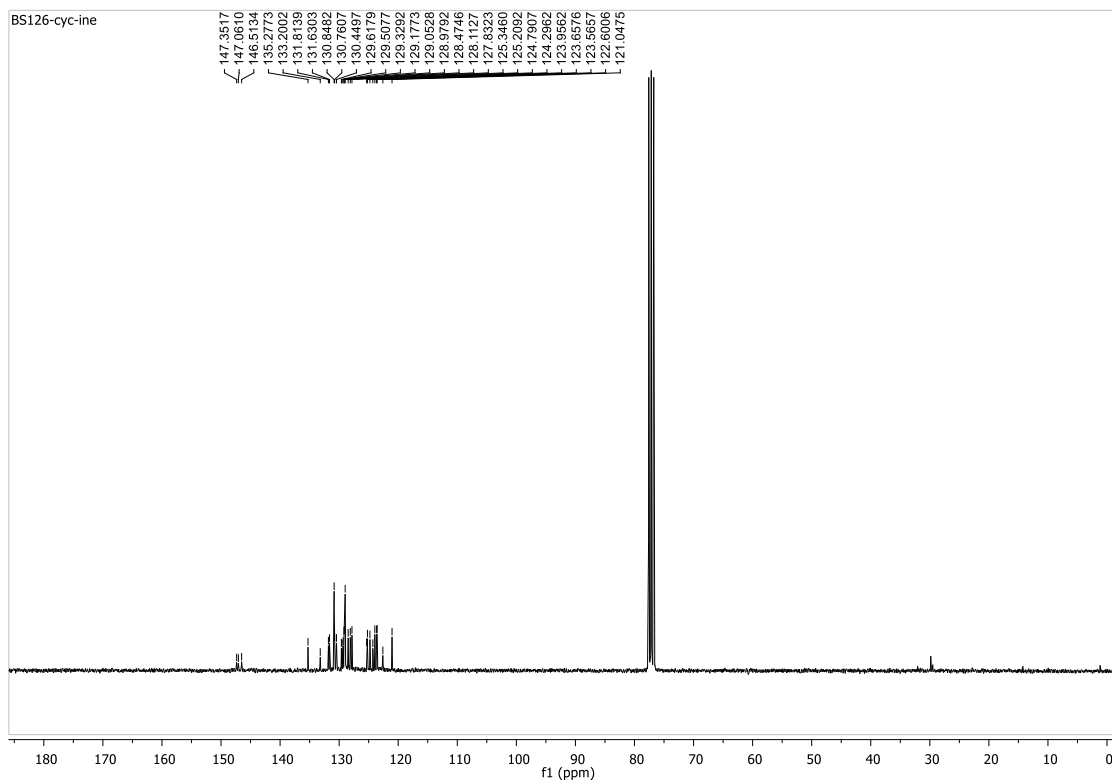

NOESY (500 MHz, CDCl<sub>3</sub>)

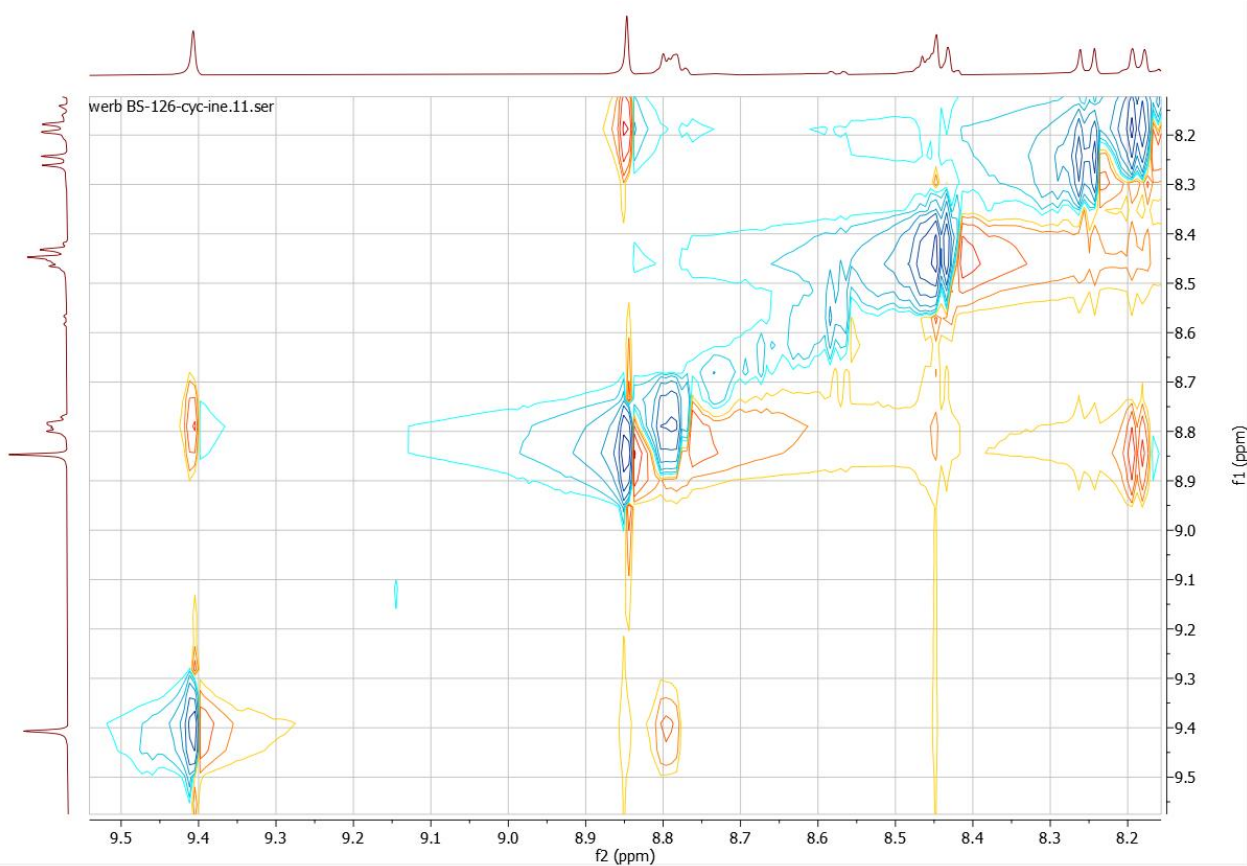



# 15-Methylphenanthro[9,10-*b*]acridine (4c)

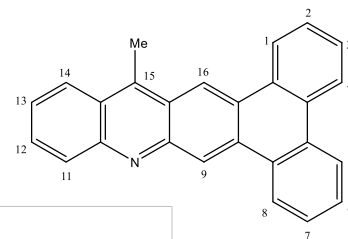

$^1\text{H}$  NMR (500 MHz,  $\text{CDCl}_3$ ) – lower concentration (about 1 mg in 0.5 mL)

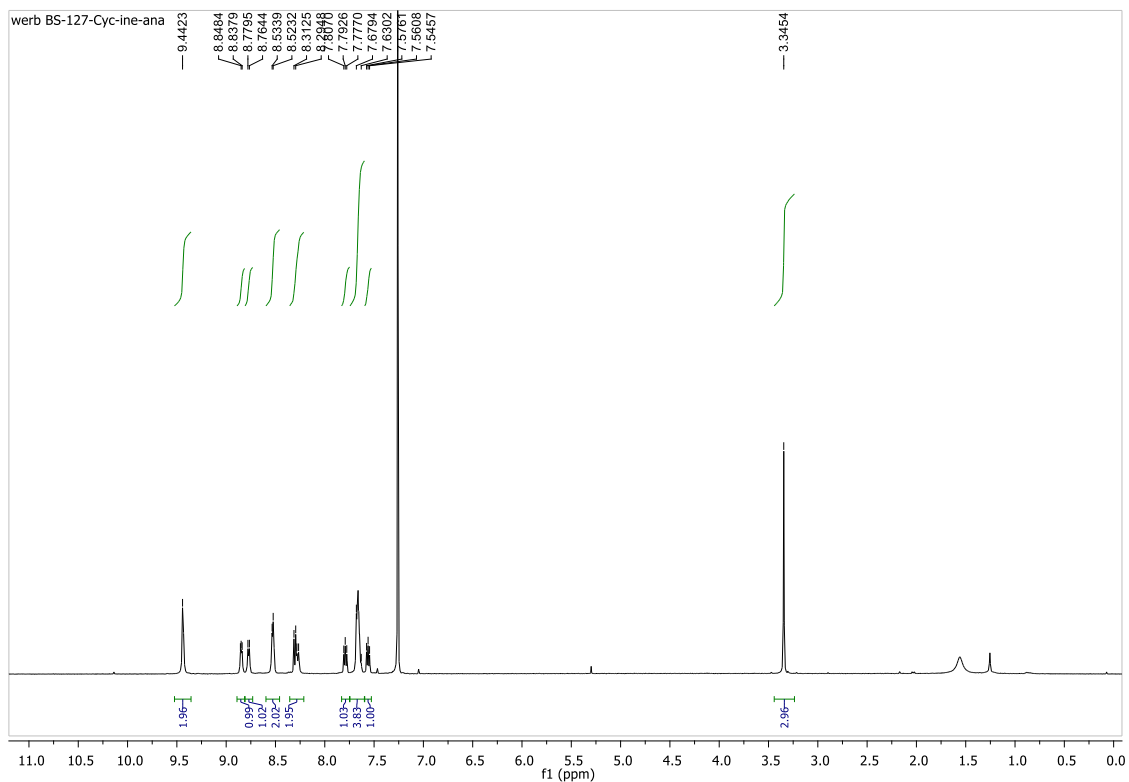

$^1\text{H}$  NMR (500 MHz,  $\text{CDCl}_3$ ) – higher concentration (about 2 mg in 0.5 mL)

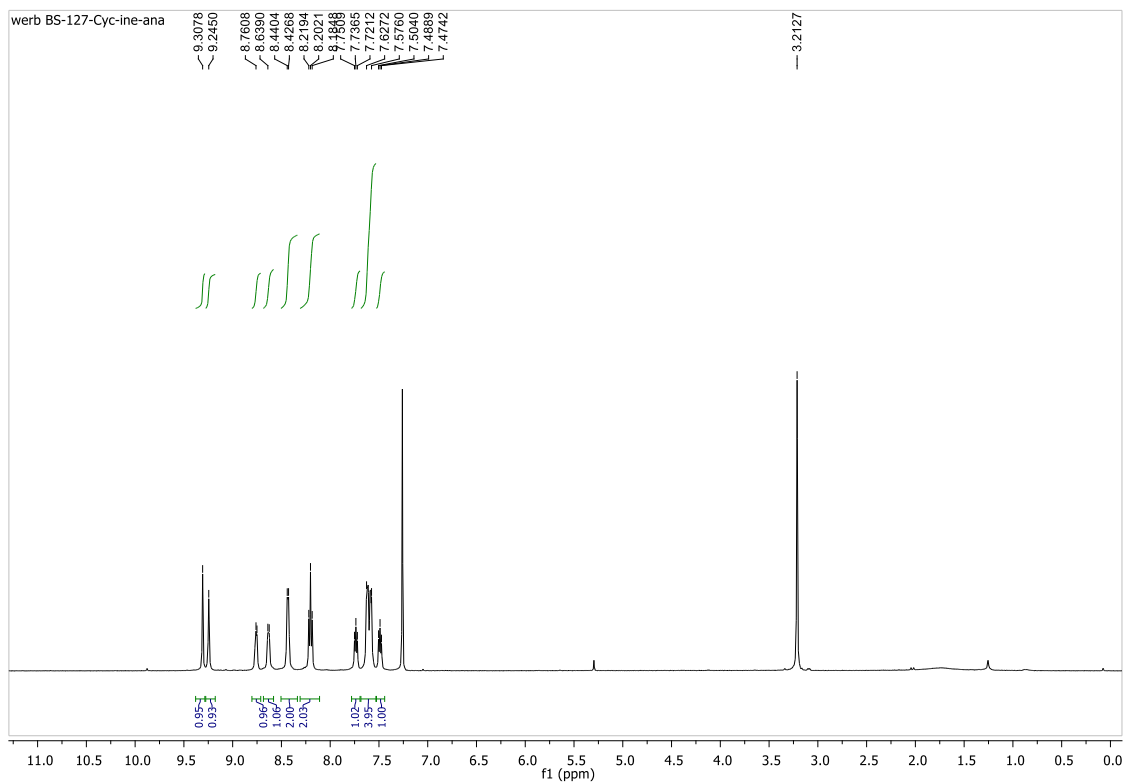

$^{13}\text{C}$  NMR (126 MHz,  $\text{CDCl}_3$ )

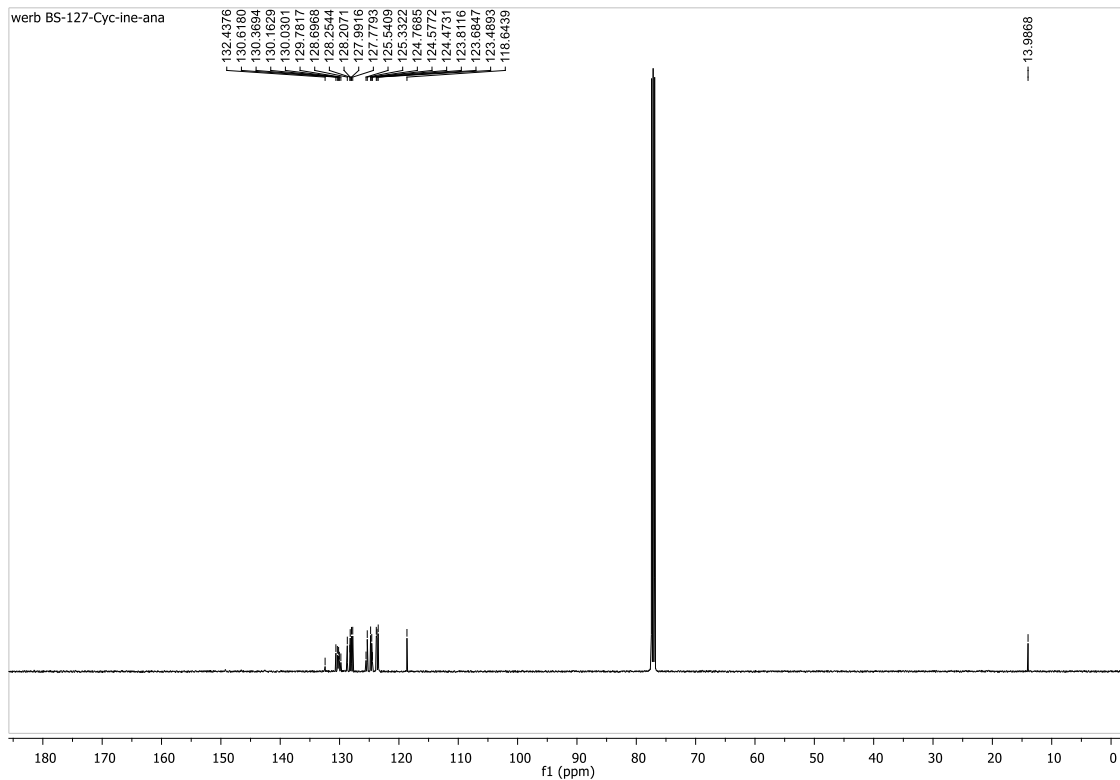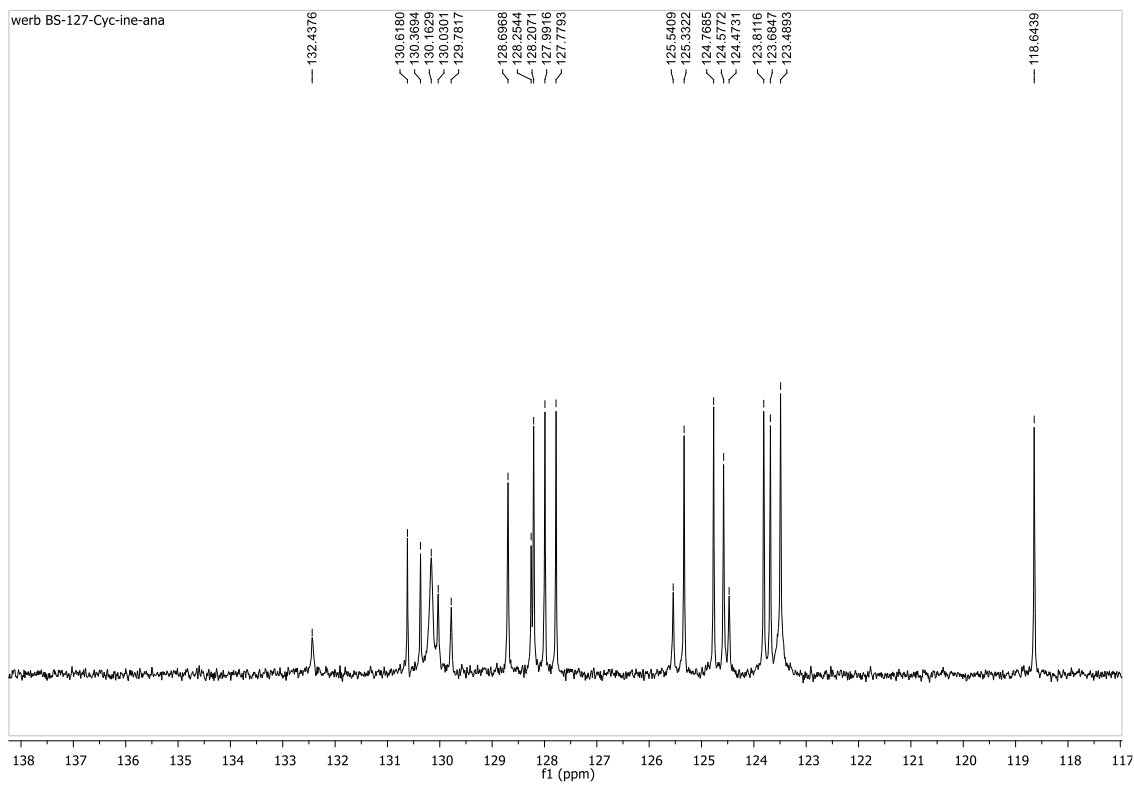

# Ethyl 2-(2-(triphenylenyl)aminobenzoate (5)

$^1\text{H}$  NMR (300 MHz,  $\text{CDCl}_3$ )

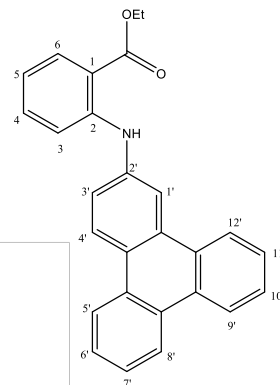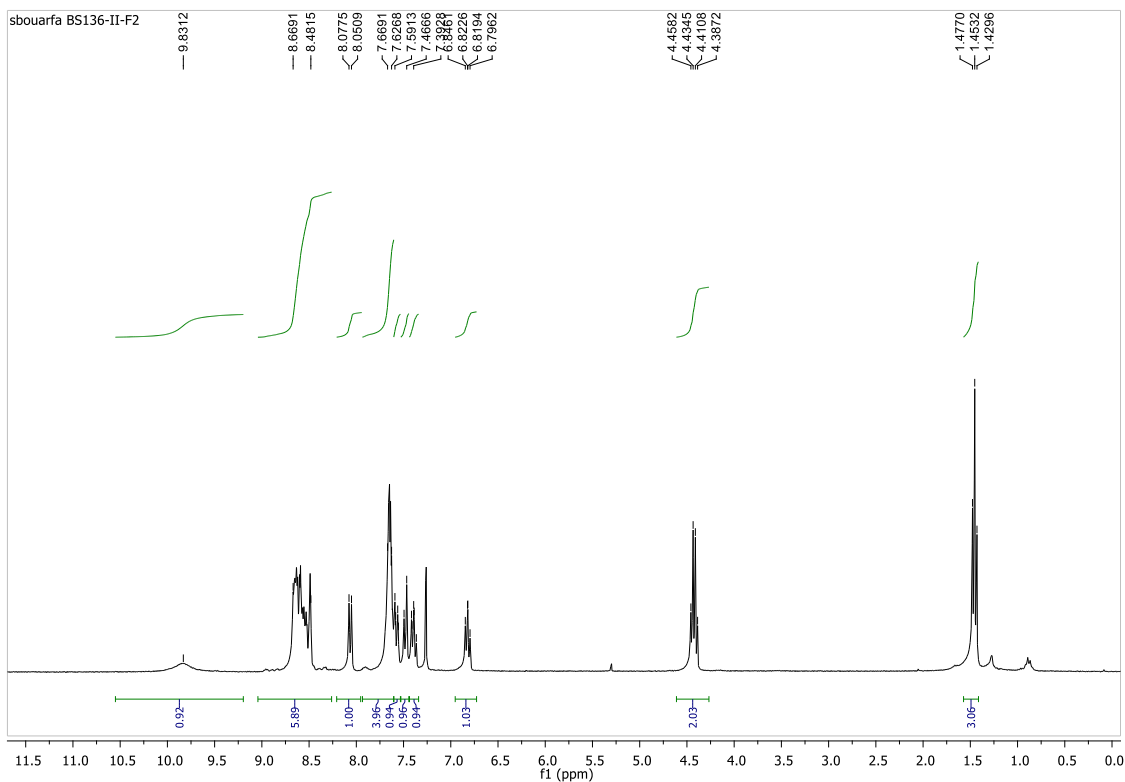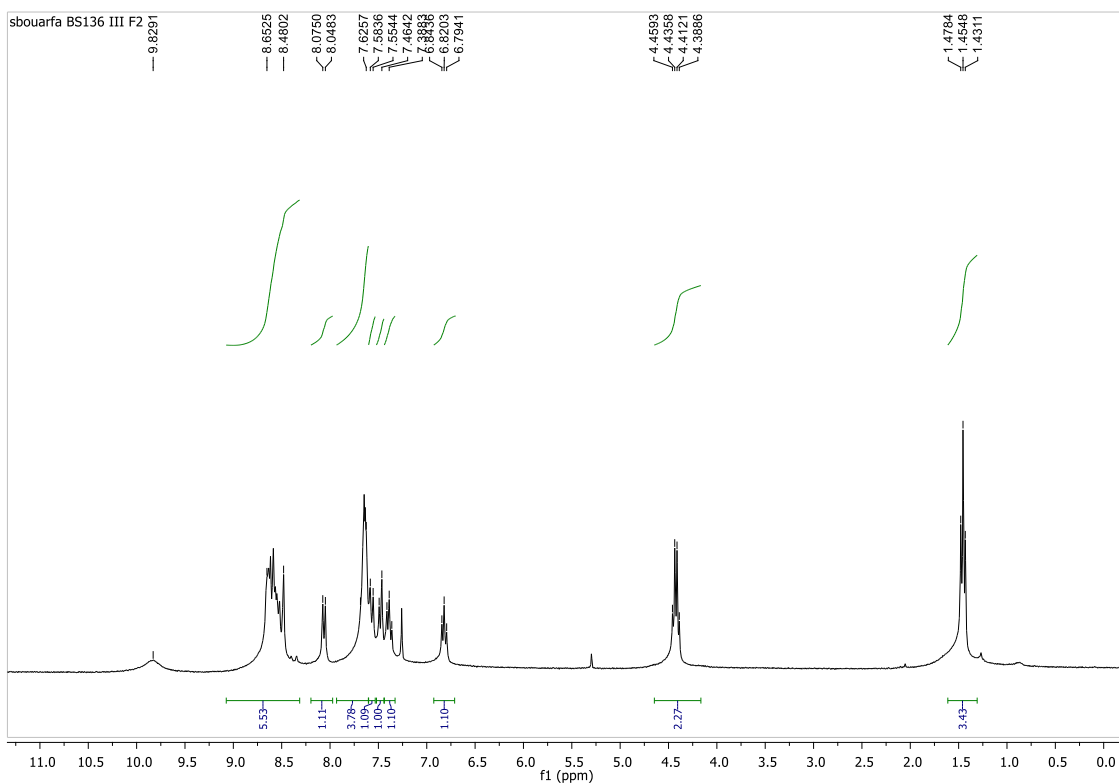

$^{13}\text{C}$  NMR (75 MHz,  $\text{CDCl}_3$ )

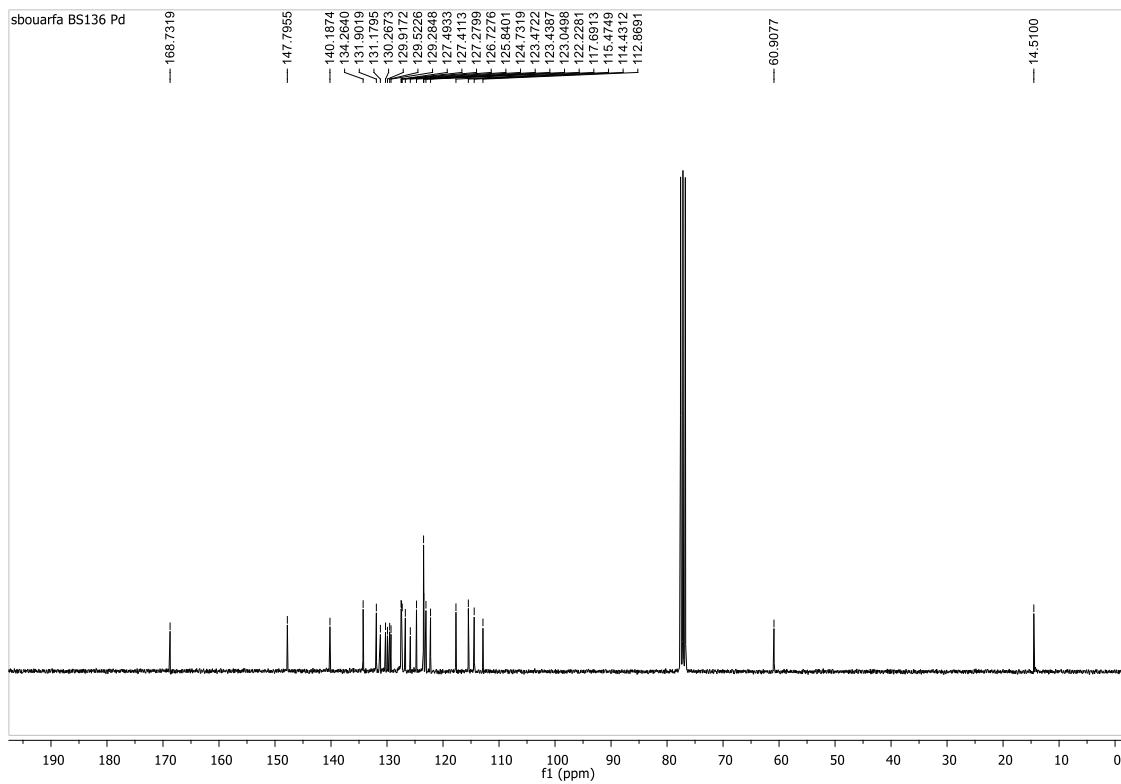

## 2-(2-Triphenylenyl)aminobenzoic acid (6)

$^1\text{H}$  NMR (300 MHz,  $(\text{CD}_3)_2\text{SO}$ )

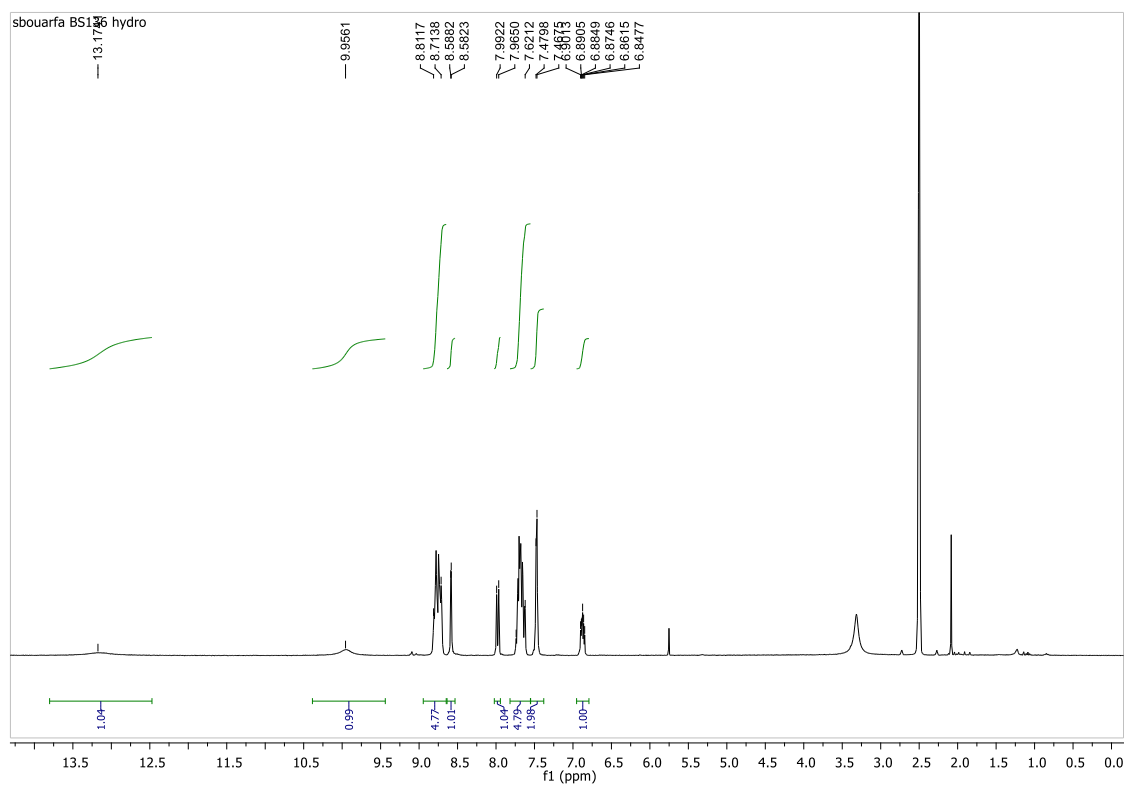

$^{13}\text{C}$  NMR (75 MHz,  $(\text{CD}_3)_2\text{SO}$ )

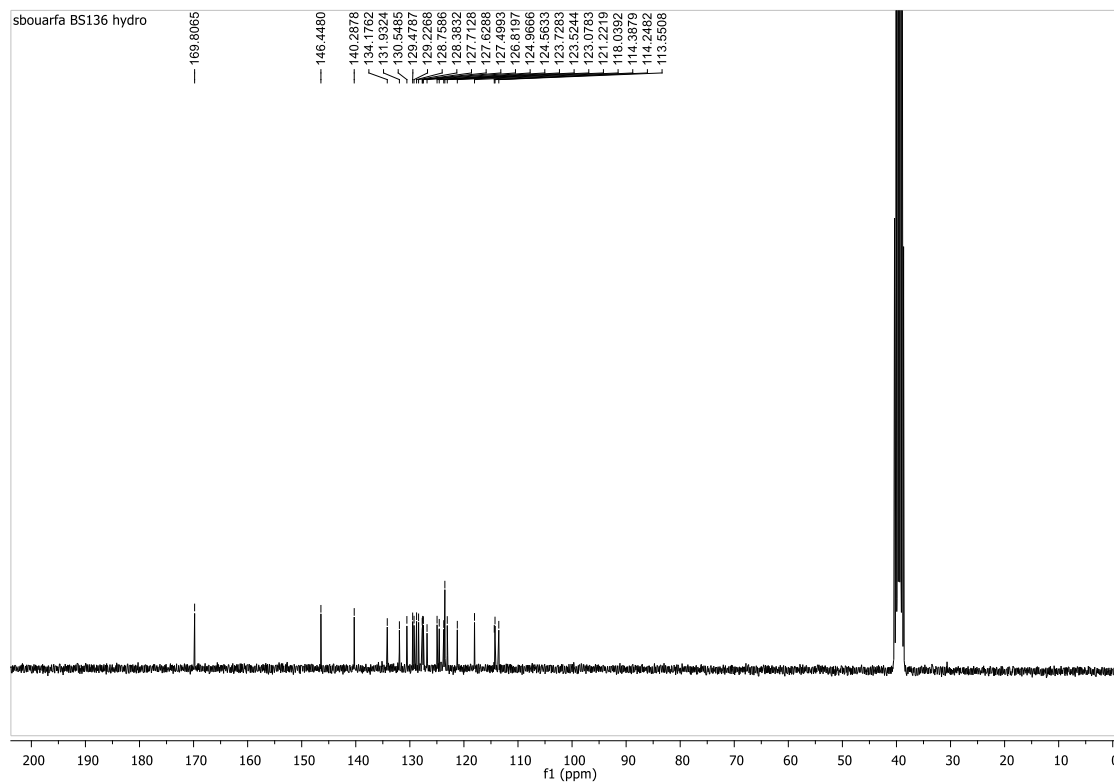

# 16-Chlorophenanthro[9,10-*a*]acridine (7)

$^1\text{H}$  NMR (300 MHz,  $\text{CDCl}_3$ )

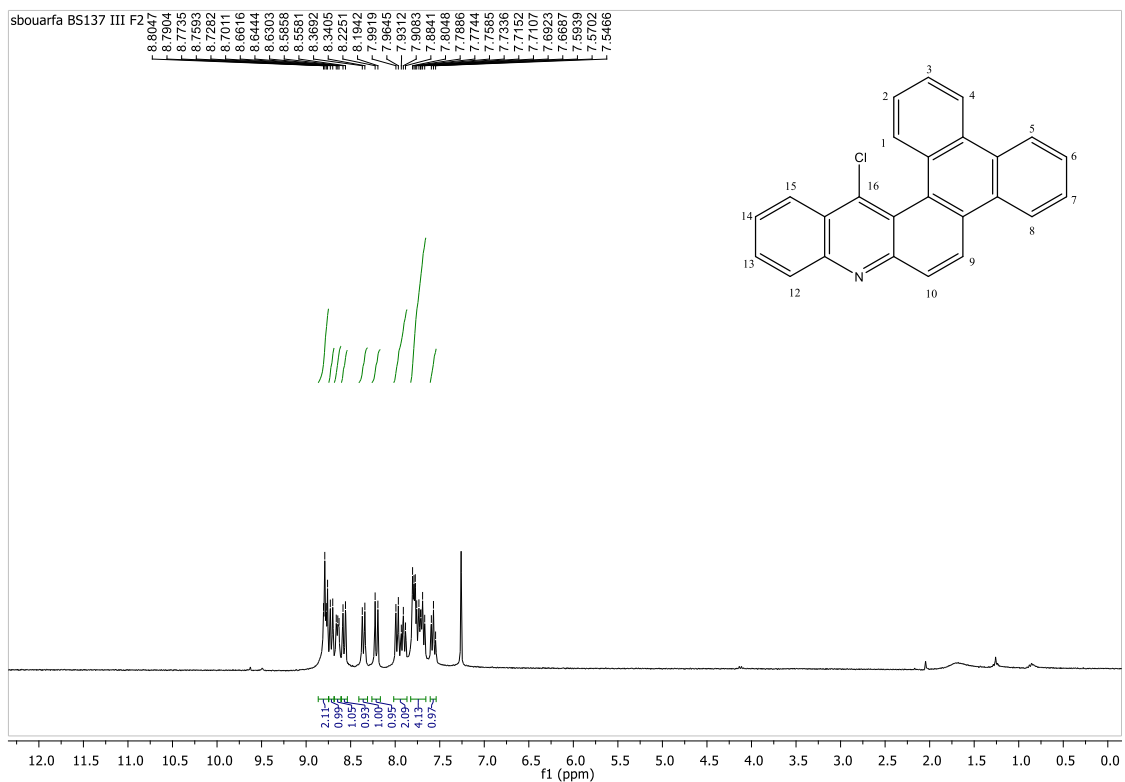

$^{13}\text{C}$  NMR (75 MHz,  $\text{CDCl}_3$ )

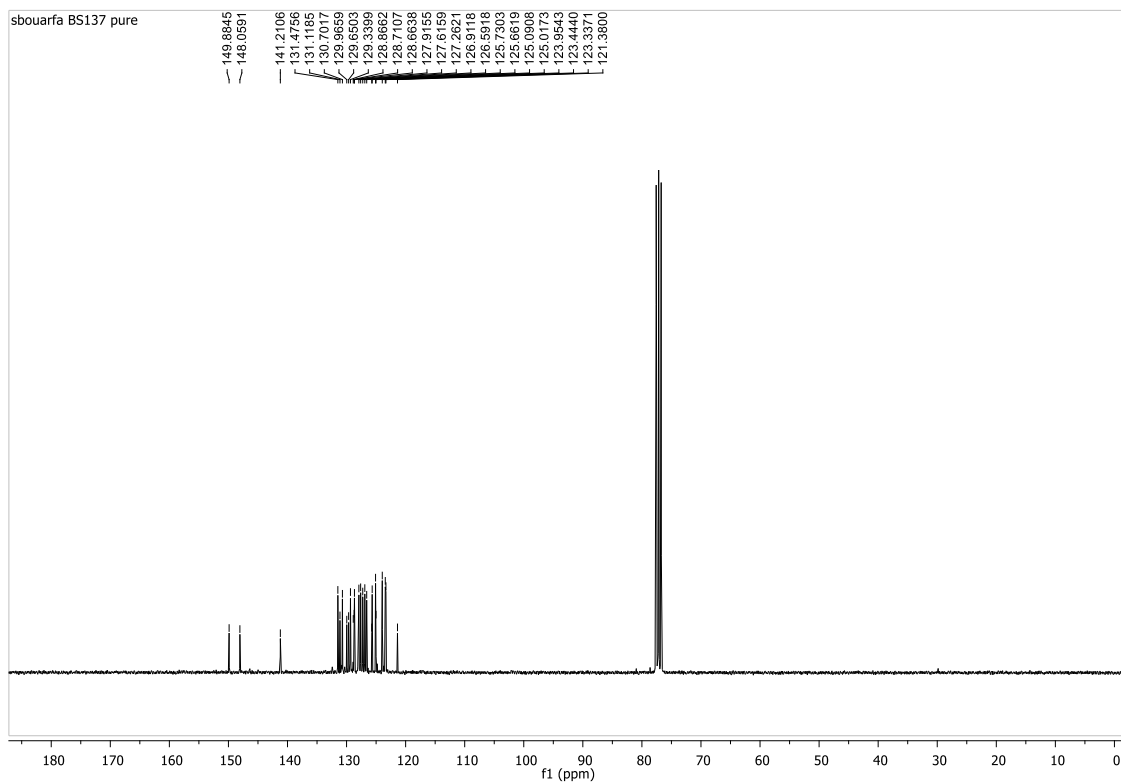

# 16-Phenoxyphenanthro[9,10-a]acridine (8)

$^1\text{H}$  NMR (300 MHz,  $\text{CDCl}_3$ )

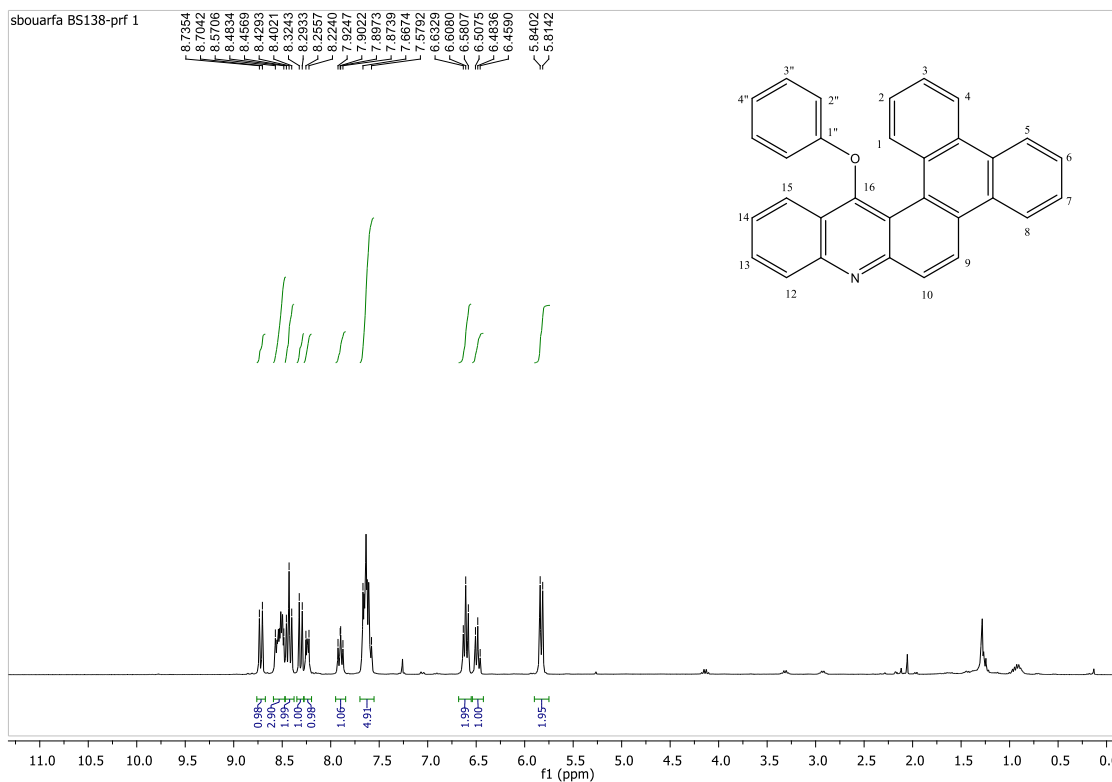

$^{13}\text{C}$  NMR (75 MHz,  $\text{CDCl}_3$ )

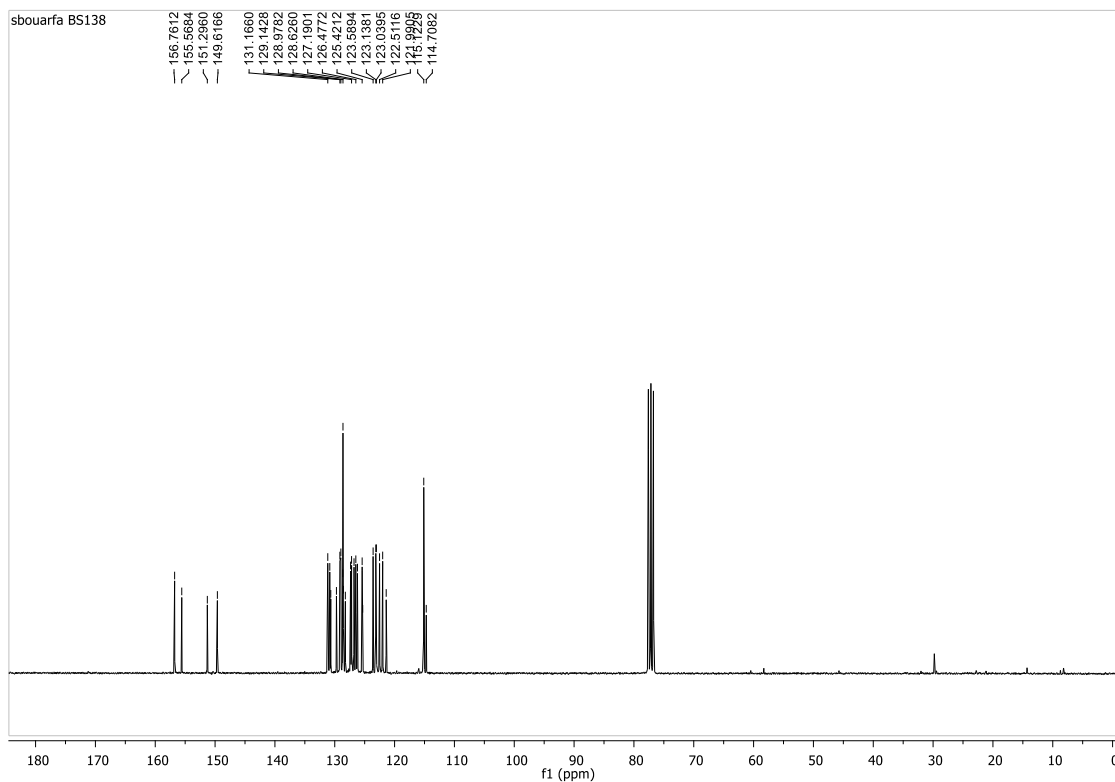

# 16-(4-Aminophenoxy)phenanthro[9,10-a]acridine (9)

<sup>1</sup>H NMR (400 MHz, CDCl<sub>3</sub>)

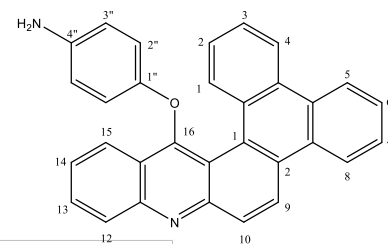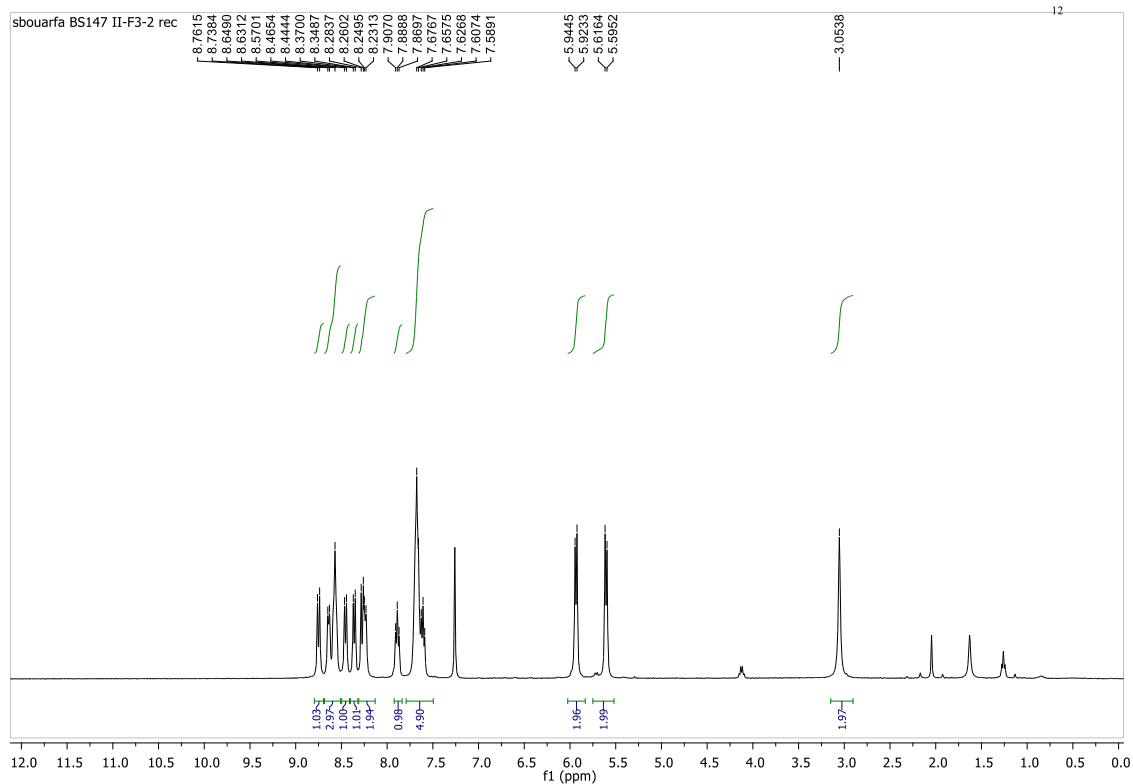

<sup>1</sup>H NMR (400 MHz, CDCl<sub>3</sub>)

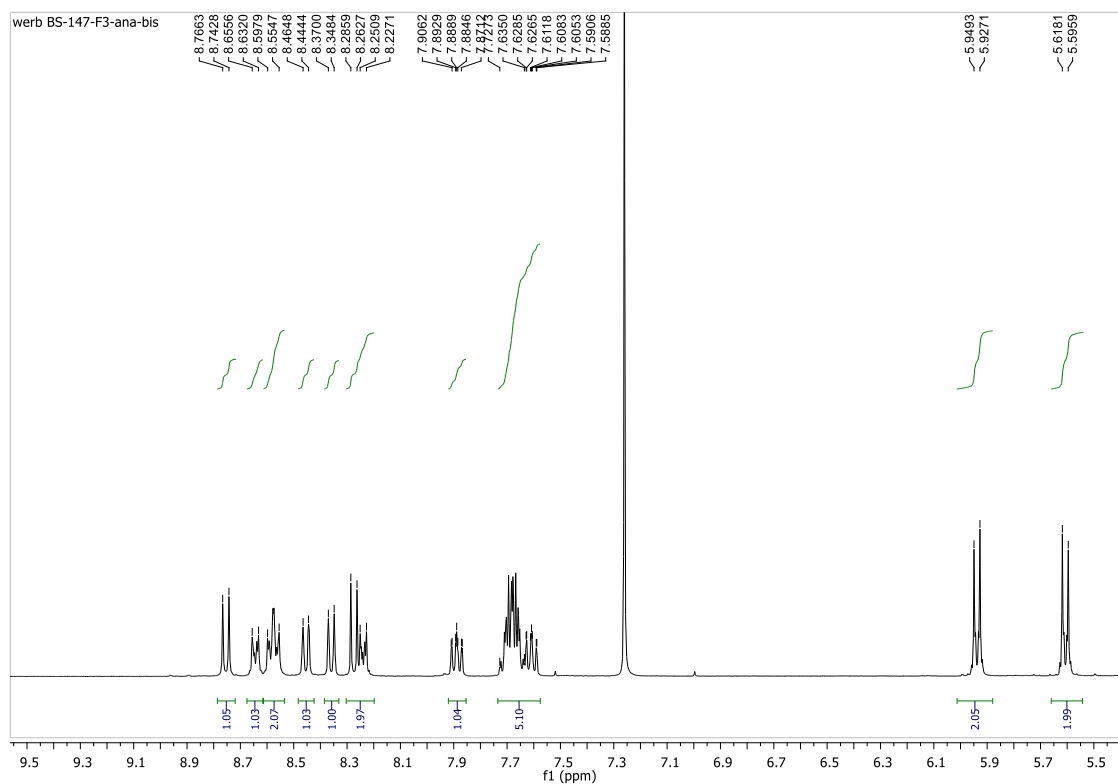



$^{13}\text{C}$  NMR (101 MHz,  $\text{CDCl}_3$ )

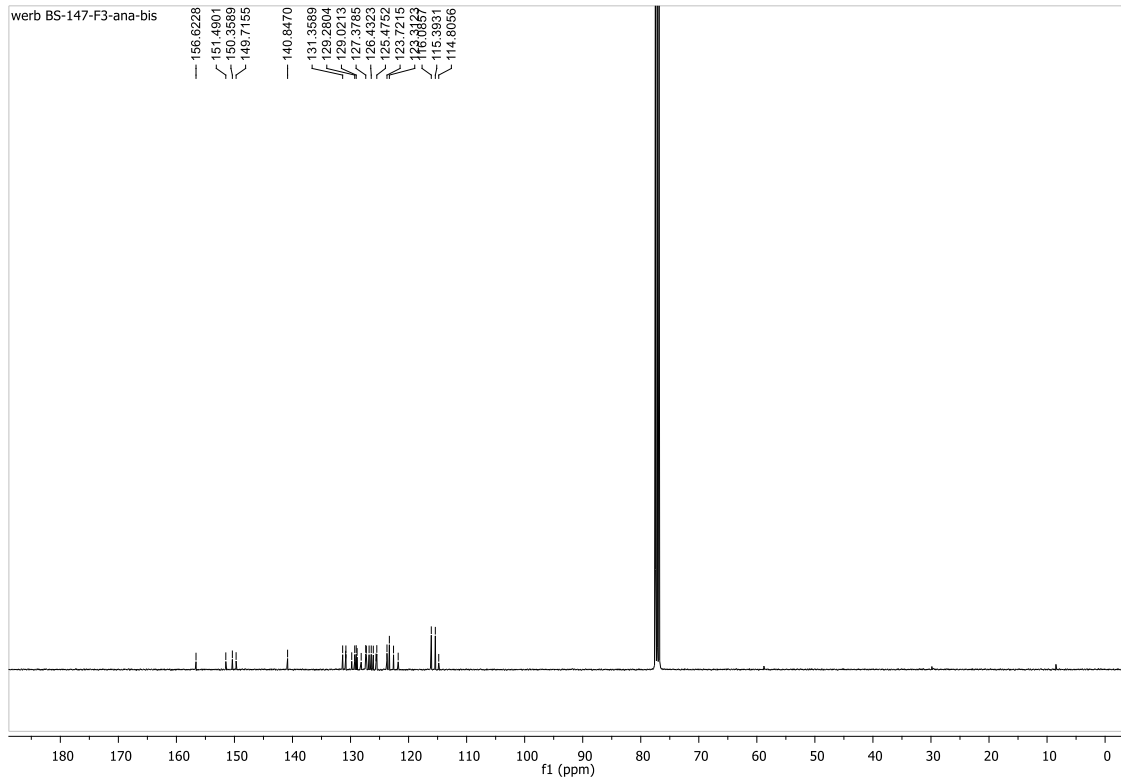



# *N*-(2-Triphenylenyl)phenanthro[9,10-*b*]-15-acridone (11)

<sup>1</sup>H NMR (500 MHz, CDCl<sub>3</sub>) – lower concentration (about 0.5 mg in 0.5 mL)

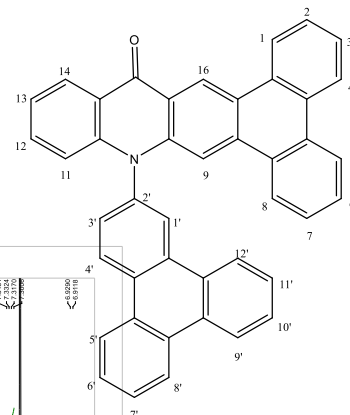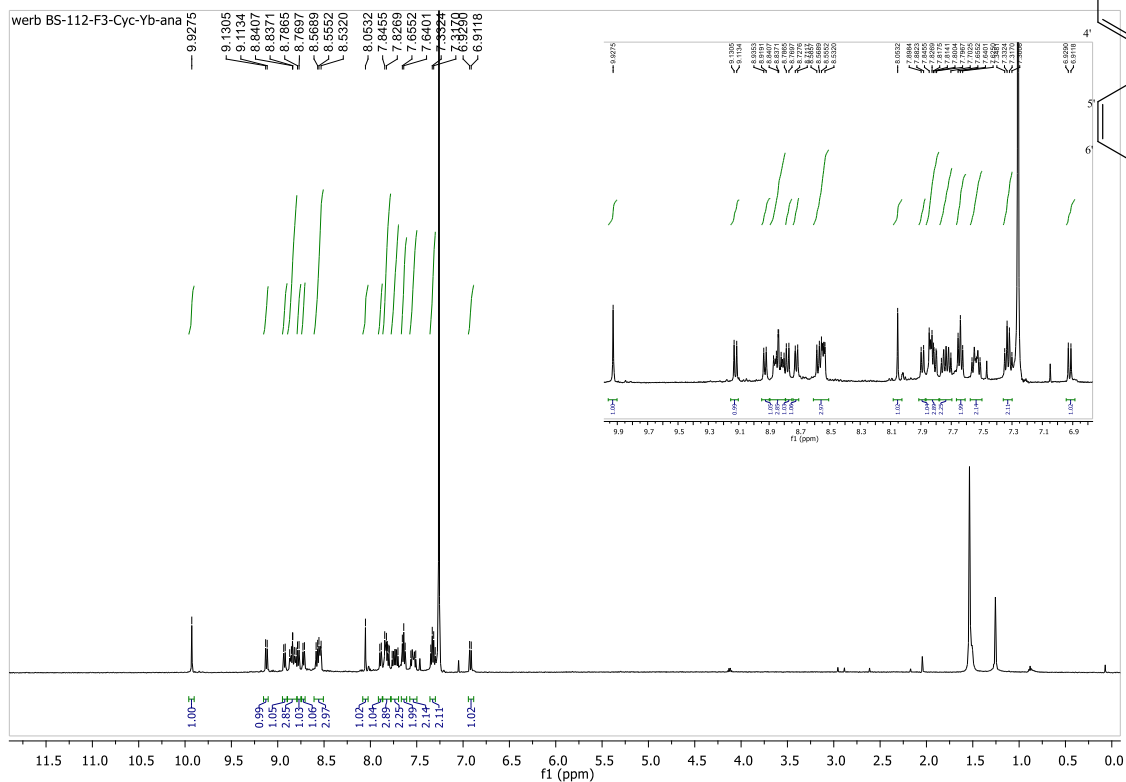

<sup>1</sup>H NMR (500 MHz, CDCl<sub>3</sub>) – lower concentration (about 0.5 mg in 0.5 mL)

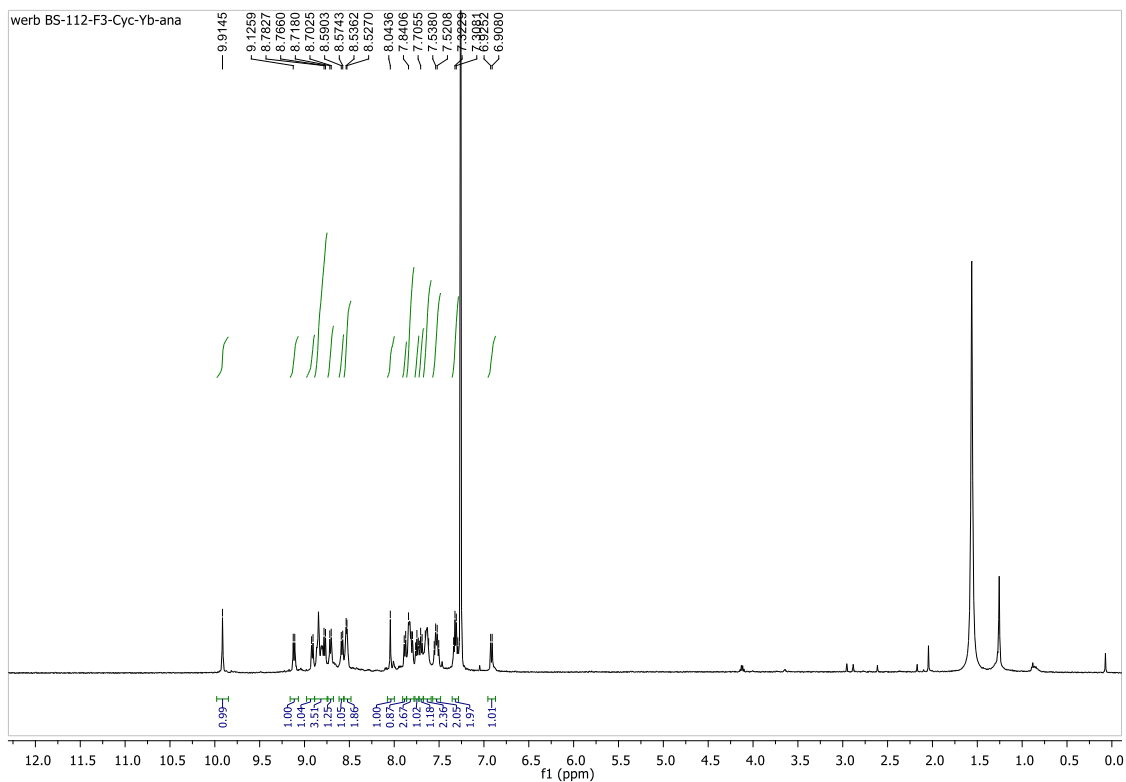

$^{13}\text{C}$  NMR (126 MHz,  $\text{CDCl}_3$ )

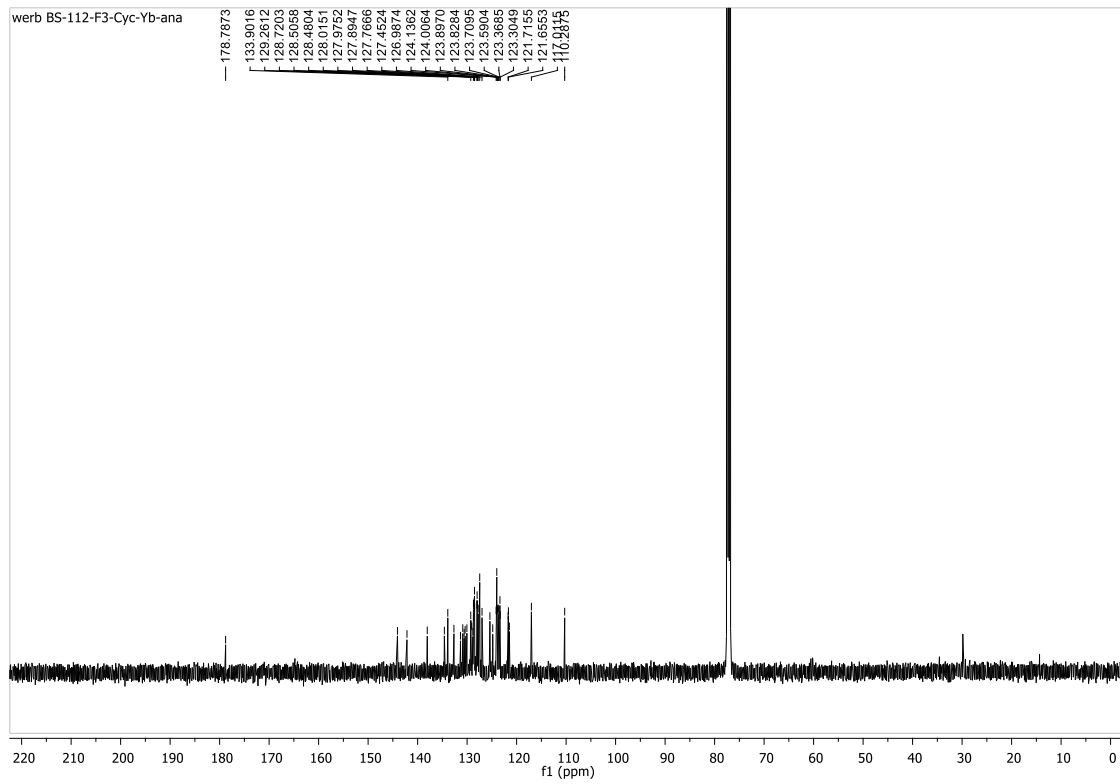

# *N*-Phenyl-*N*-(2-triphenylenyl)-2-aminobenzaldehyde (12)

$^1\text{H}$  NMR (500 MHz,  $\text{CDCl}_3$ )

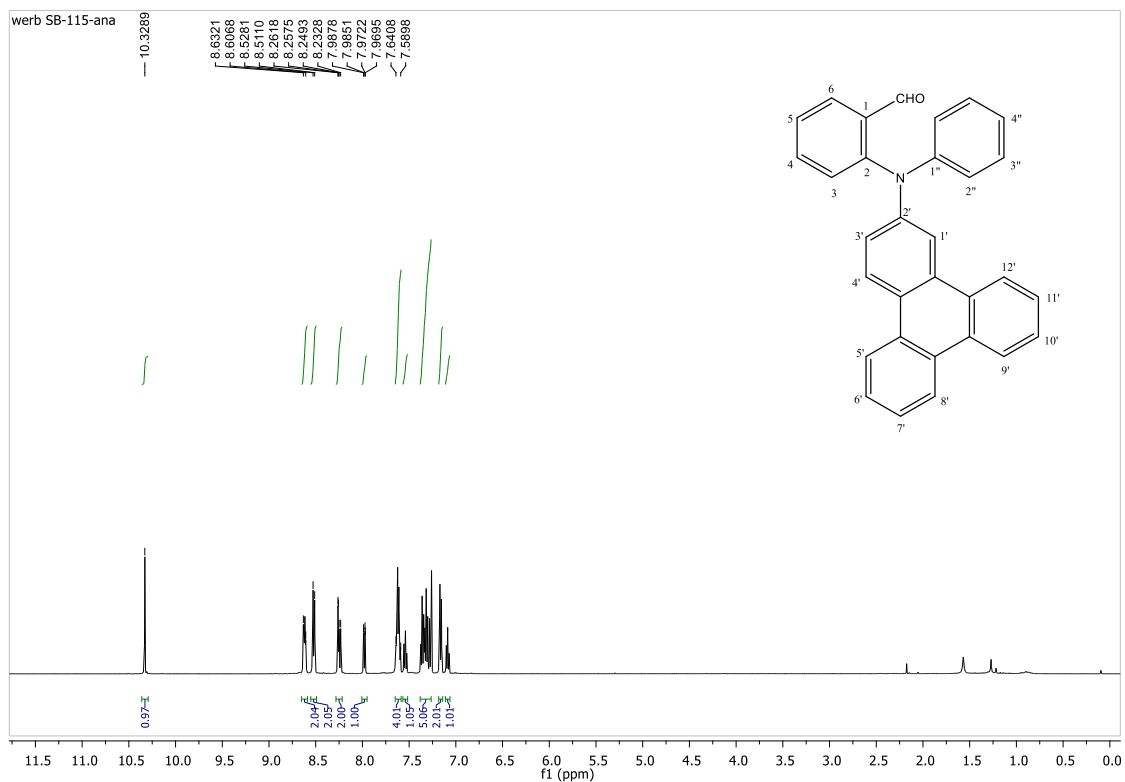

$^{13}\text{C}$  NMR (126 MHz,  $\text{CDCl}_3$ )

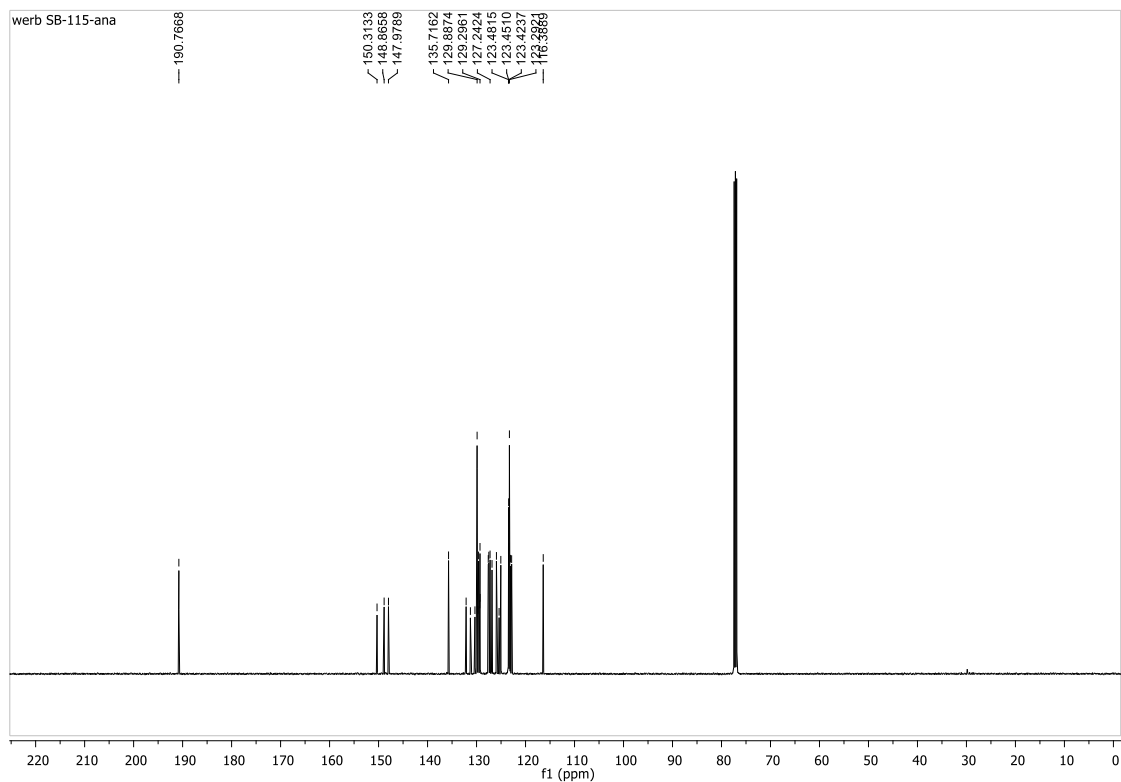

# *N*-(2-Triphenylenyl)-9-acridone (13)

$^1\text{H}$  NMR (500 MHz,  $\text{CDCl}_3$ )

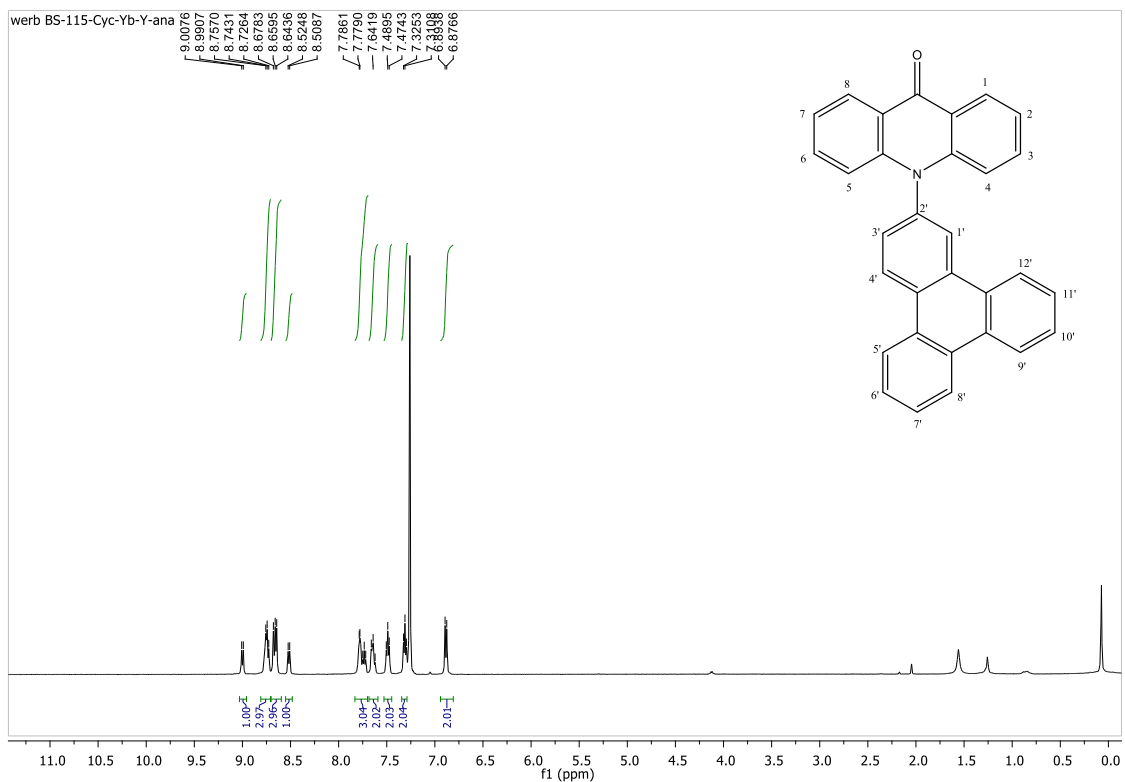

$^{13}\text{C}$  NMR (126 MHz,  $\text{CDCl}_3$ )

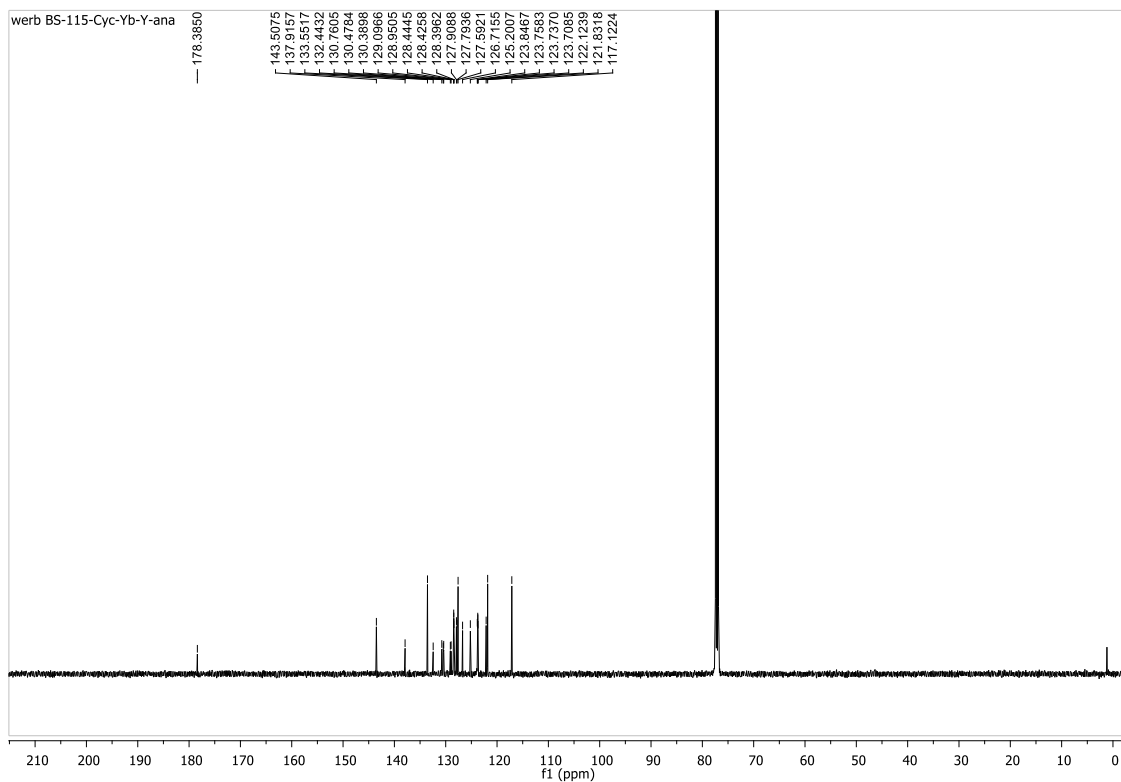

NOESY (500 MHz, CDCl<sub>3</sub>)

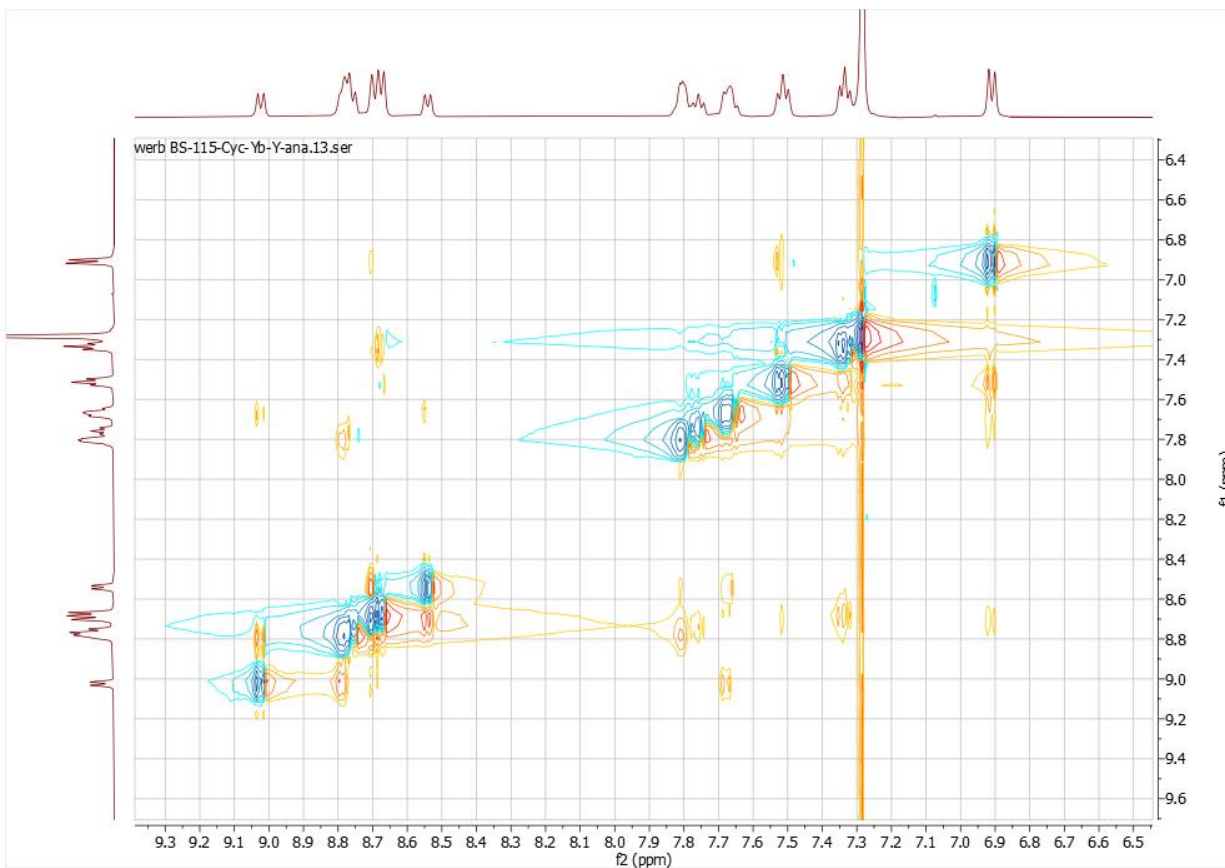

# Highest occupied Hückel molecular orbitals (HOMO)

**A**

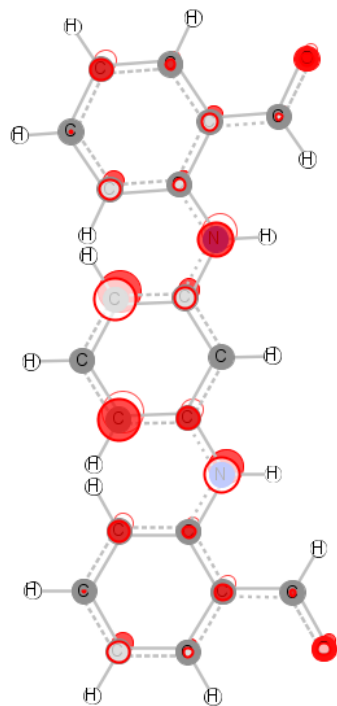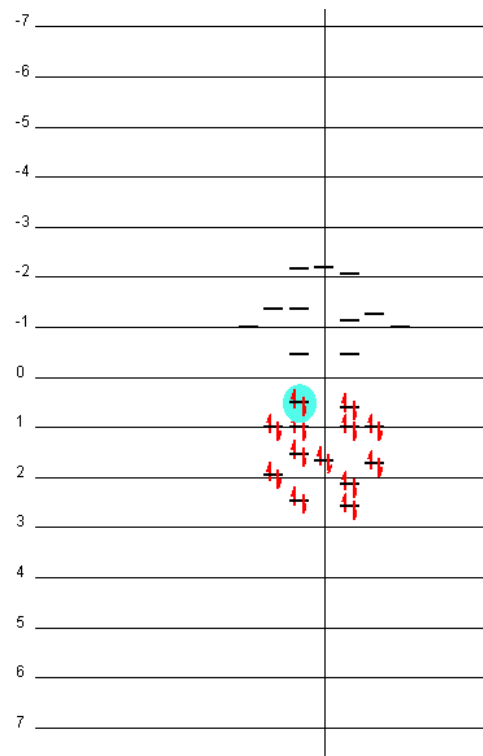

**B**

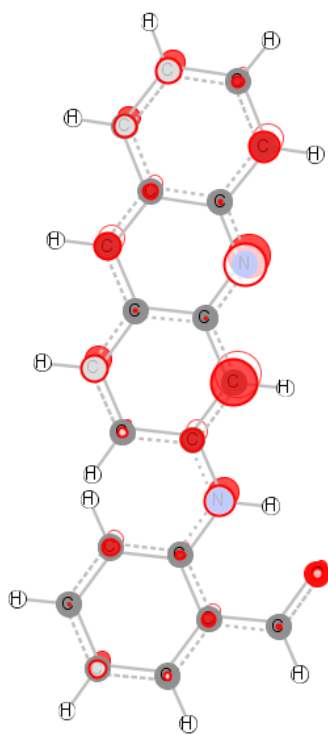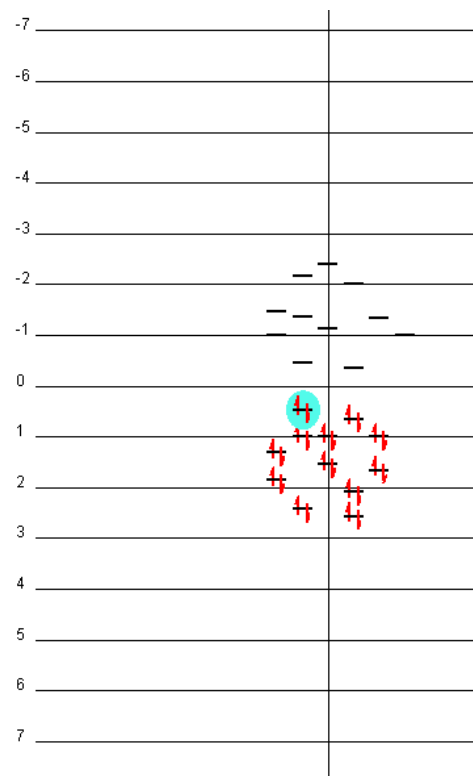



C

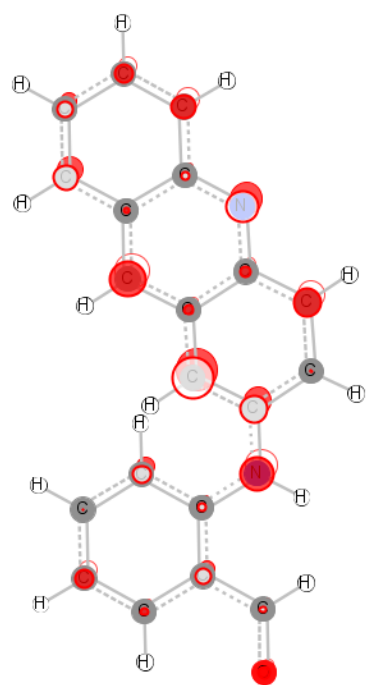

$$\epsilon = \alpha + 0.42\beta$$

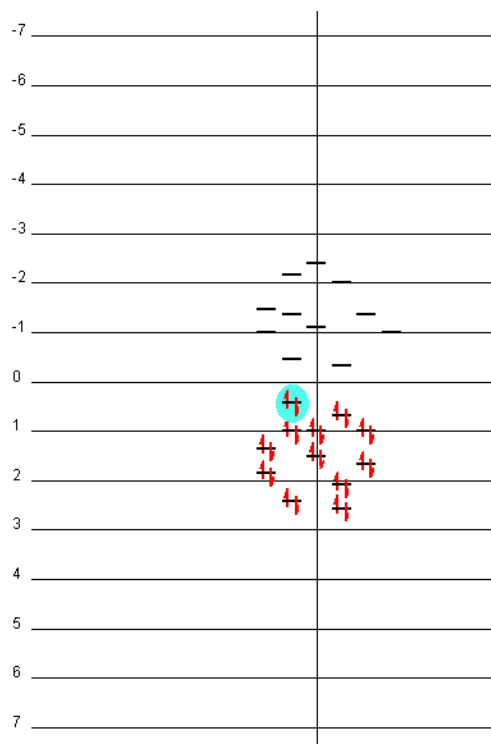

1

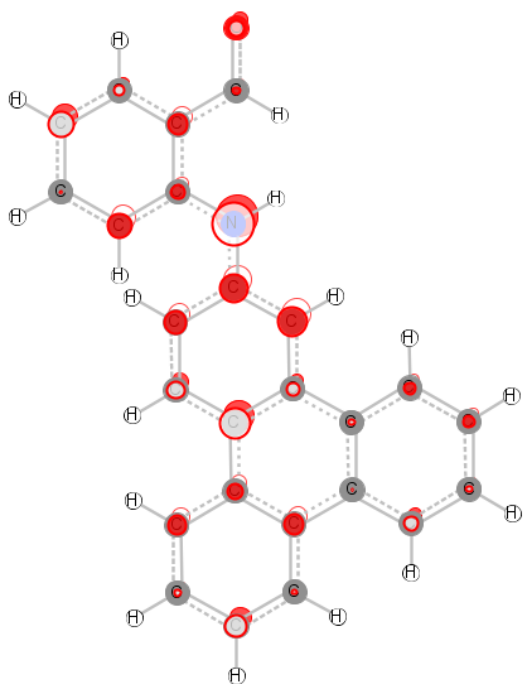

$$\epsilon = \alpha + 0.49\beta$$

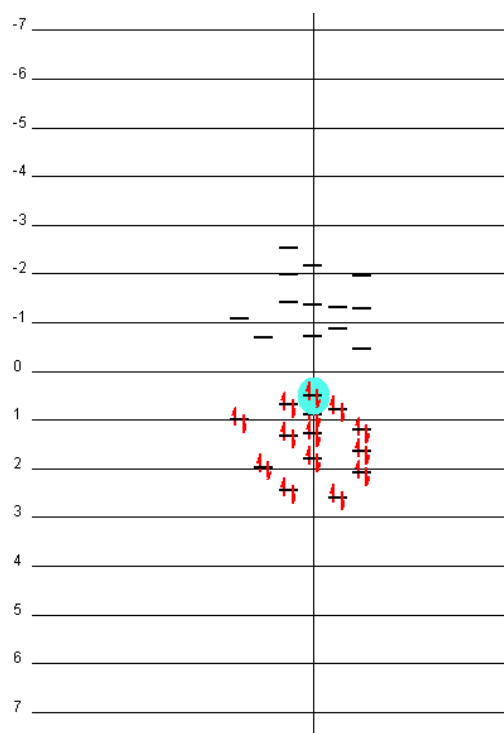

3a

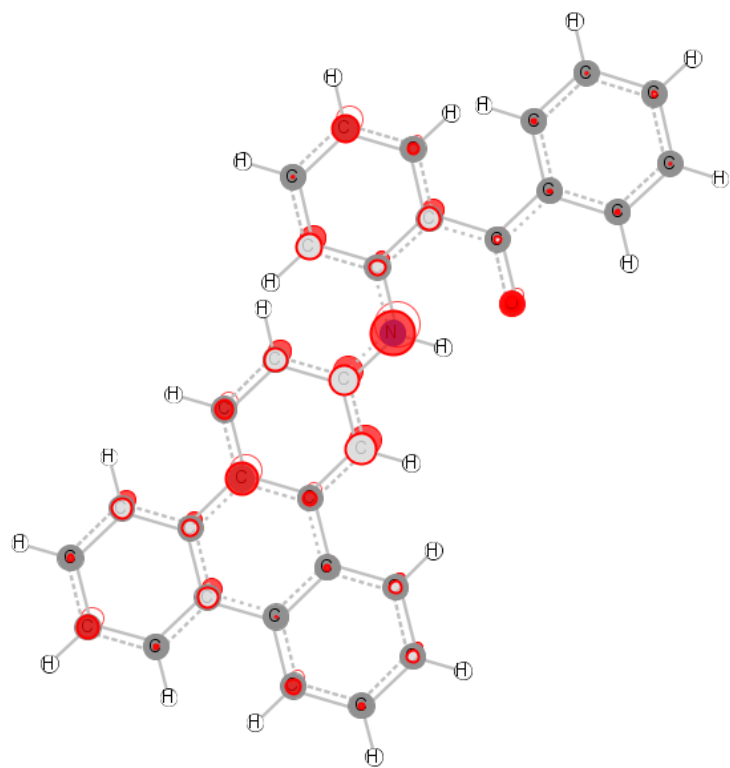

$$\epsilon = \alpha + 0.49\beta$$

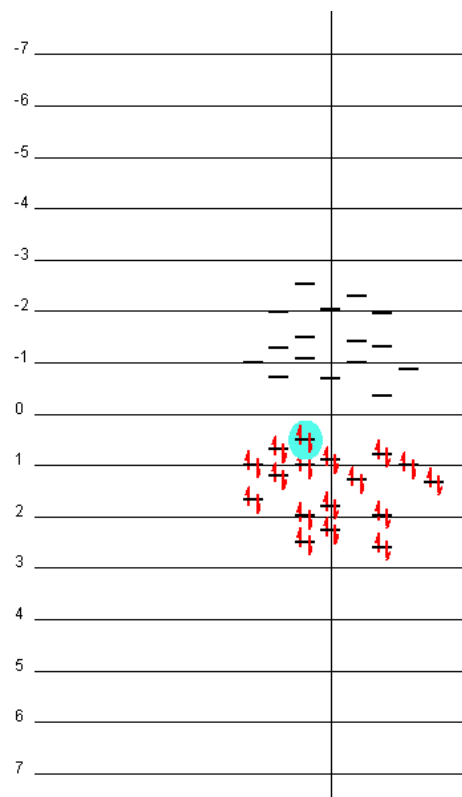

3b

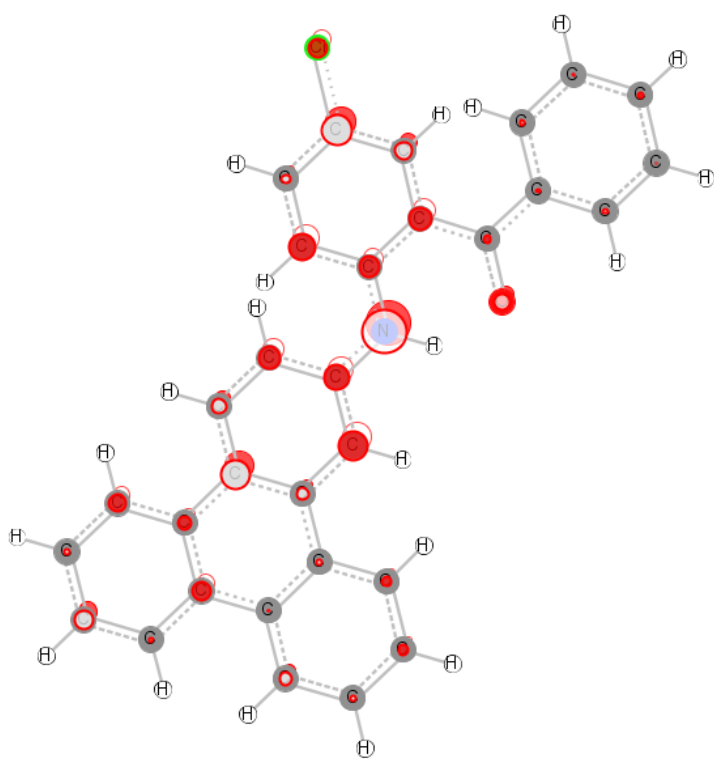

$$\epsilon = \alpha + 0.48\beta$$

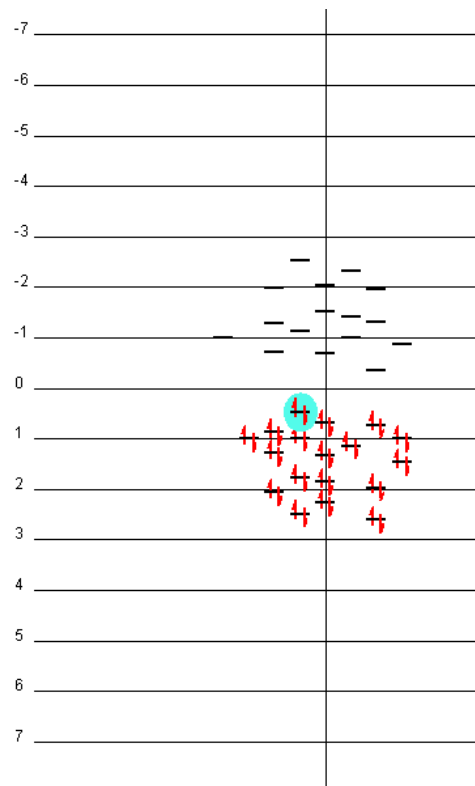

3c

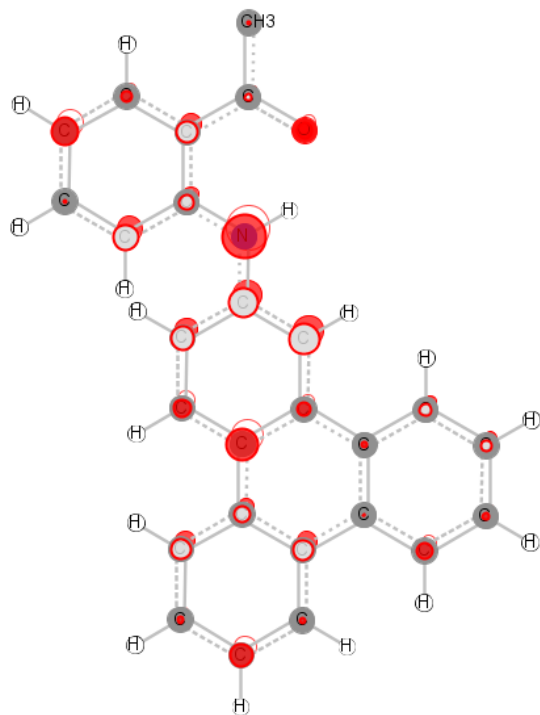

$$\epsilon = \alpha + 0,49\beta$$

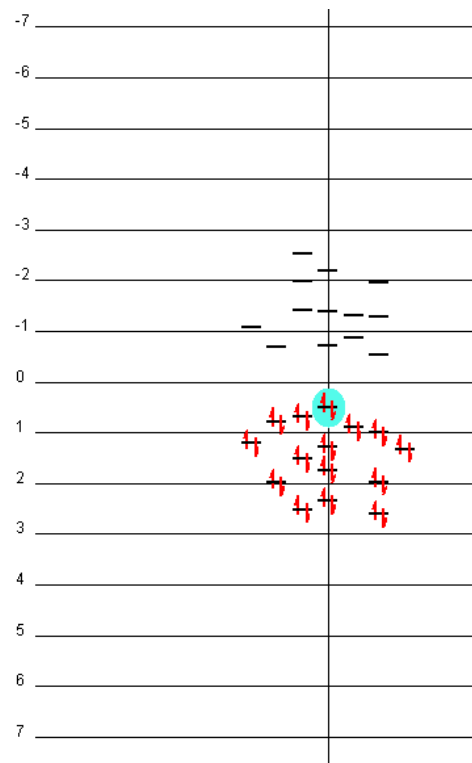

5

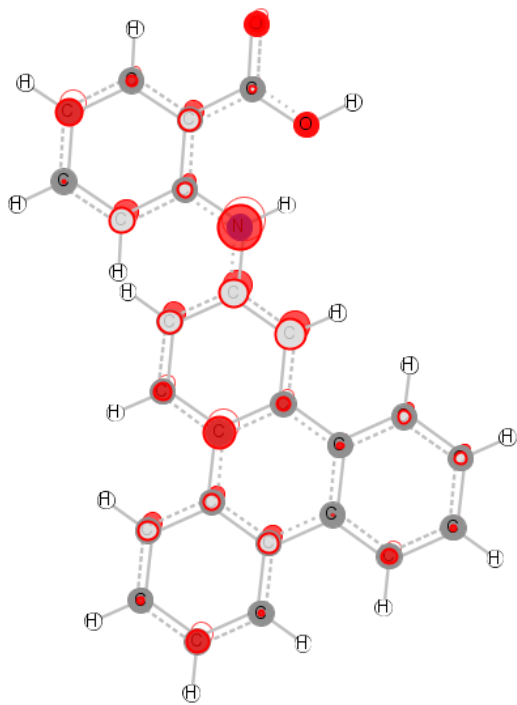

$$\epsilon = \alpha + 0,49\beta$$

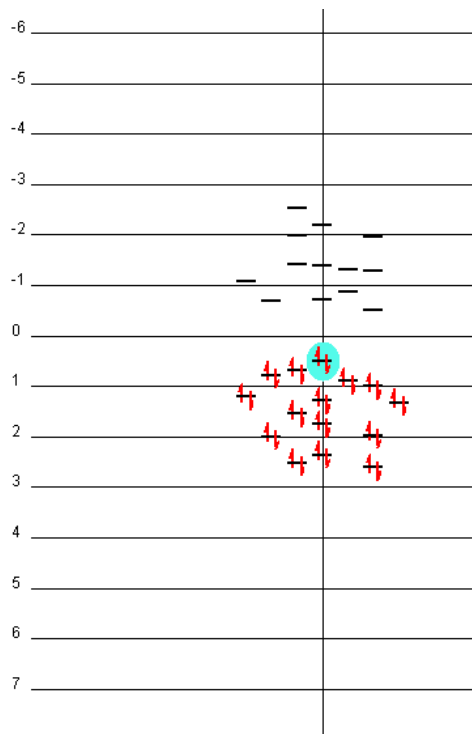

10

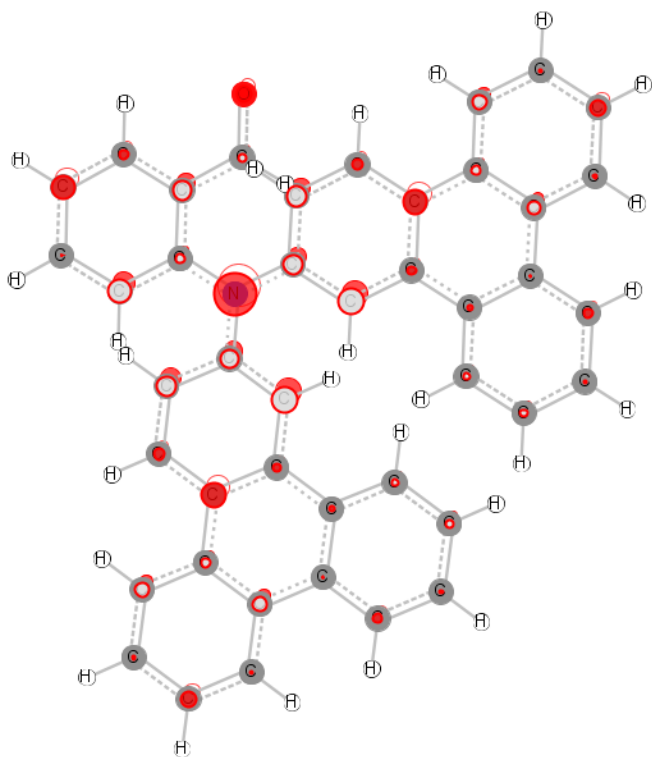

$\epsilon = \alpha + 0.41\beta$

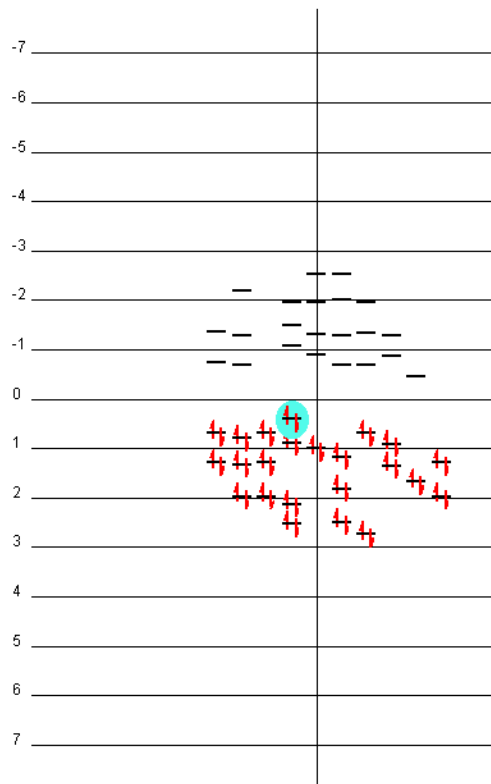

12

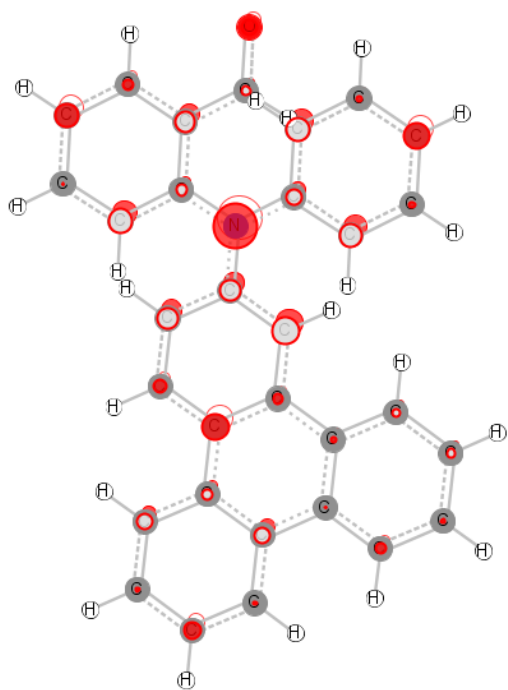

$\epsilon = \alpha + 0.43\beta$

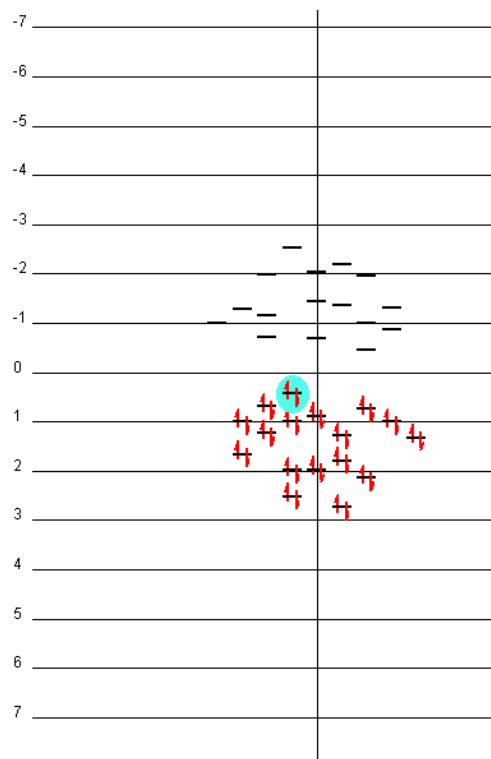

## Qualitative evaluation of 8 and 9 as matrices for MALDI-MS

### Matrices

DCTB, HCCA, 9-AA, **8** and **9** were used as matrices.

| Name     | Structure                                                                          | Formula                                          | [M-H] <sup>-</sup> | [M+H] <sup>+</sup> | [M+Na] <sup>+</sup> |
|----------|------------------------------------------------------------------------------------|--------------------------------------------------|--------------------|--------------------|---------------------|
| DCTB     | 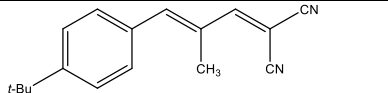  | C <sub>17</sub> H <sub>18</sub> N <sub>2</sub>   | 249.14             | 251.15             | 273.14              |
| HCCA     |   | C <sub>10</sub> H <sub>7</sub> NO <sub>3</sub>   | 188.04             | 190.05             | 212.03              |
| 9-AA     |   | C <sub>13</sub> H <sub>10</sub> N <sub>2</sub>   | 193.08             | 195.09             | 217.07              |
| <b>8</b> |   | C <sub>31</sub> H <sub>19</sub> NO               | 420.14             | 422.15             | 444.14              |
| <b>9</b> |  | C <sub>31</sub> H <sub>20</sub> N <sub>2</sub> O | 435.15             | 437.16             | 459.15              |

### Target compounds

| # | Dénomination        | Formula                                                                                              | [M-H] <sup>-</sup> /A <sup>-</sup> | [M+H] <sup>+</sup> | [M+Na] <sup>+</sup> | [M+K] <sup>+</sup> | [M-H+2Na] <sup>+</sup> |
|---|---------------------|------------------------------------------------------------------------------------------------------|------------------------------------|--------------------|---------------------|--------------------|------------------------|
| 1 | Aspirin             | C <sub>9</sub> H <sub>8</sub> O <sub>4</sub>                                                         | 179.03                             | 181.05             | 203.03              | 219.01             | 225.01                 |
| 2 | Captopril           | C <sub>9</sub> H <sub>15</sub> NO <sub>3</sub> S                                                     | 216.07                             | 218.08             | 240.07              | 256.05             | 262.05                 |
| 3 | Metolachlor ESA     | C <sub>15</sub> H <sub>23</sub> NO <sub>5</sub> S                                                    | 328.12                             | 330.14             | 352.12              | 368.09             | 374.10                 |
| 4 | Paracetamol         | C <sub>8</sub> H <sub>9</sub> NO <sub>2</sub>                                                        | 150.06                             | 152.07             | 174.05              | 190.03             | 196.03                 |
| 5 | Phenytoin           | C <sub>15</sub> H <sub>12</sub> N <sub>2</sub> O <sub>2</sub>                                        | 251.08                             | 253.10             | 275.08              | 291.05             | 297.06                 |
| 6 | Penicilin V         | C <sub>16</sub> H <sub>18</sub> N <sub>2</sub> O <sub>5</sub> S                                      | 349.09                             | 351.10             | 373.08              | 389.06             | 395.06                 |
| 7 | Penicillin V (K)    | (A <sup>-</sup> : C <sub>16</sub> H <sub>17</sub> N <sub>2</sub> O <sub>5</sub> S ; K <sup>+</sup> ) | 349.09                             | 389.06             | 411.04              | 427.01             | 433.02                 |
| 8 | SDS                 | (A <sup>-</sup> : C <sub>12</sub> H <sub>25</sub> O <sub>4</sub> S ; Na <sup>+</sup> )               | 265.15                             | 289.14             | 311.13              | 327.10             | 333.11                 |
| 9 | Sodium taurocholate | (A <sup>-</sup> : C <sub>26</sub> H <sub>44</sub> NO <sub>7</sub> S ; Na <sup>+</sup> )              | 514.28                             | 538.28             | 560.26              | 576.24             | 582.24                 |

### Qualitative detection

The experiments were performed in both positive and negative modes, with five matrices (DCTB, HCCA, 9-AA, **8** and **9**), with two solvents for a two-layer spotting (90 spots and 180 experiments).

Matrices were dissolved at 10 mg/mL in methanol or dichloromethane. Target compounds were dissolved at 1 mg/mL in the same solvent. The solutions were dispensed onto an MTP AnchorChip 384 TF target (Bruker Daltonics, P/N 209514) with a GELoader pipette tip. A first layer of target compounds mixture was twice spotted (2\*0.25  $\mu$ L) and dried at room temperature. A second layer of matrix mixture was twice spotted (2\*0.25  $\mu$ L) and dried at room temperature. The 90 spots were analyzed with an Ultraflex III MALDI-TOF/TOF mass spectrometer (Bruker Daltonics) operating under Flex Control™ software (Version 3.4, Build 119, Bruker Daltonics). MALDI-TOF spectra were observed in positive and negative ion reflector mode recording ions between 100 to 2000 Da. The laser power was adjusted to a point slightly above the fluence of the base peak and fired to accumulate 500 counts on the base peak with 200 laser shots. Analysis and annotations of MS spectra were performed manually.

### Qualitative information and evaluation factors

For the qualitative information, evaluation factors were chosen and scaled from 0 to 6.

Laser power is better with a small value.

|                |      |        |        |        |        |        |      |
|----------------|------|--------|--------|--------|--------|--------|------|
| Laser Power    | <15% | 15-24% | 25-34% | 35-44% | 45-55% | 56-65% | >66% |
| Laser (+ or -) | 6    | 5      | 4      | 3      | 2      | 1      | 0    |

The presence of the target compounds is represented by the factor target.in in correlation with the relative intensity in mass spectrum.

|                    |                  |                  |                  |              |             |          |
|--------------------|------------------|------------------|------------------|--------------|-------------|----------|
| Relative Intensity | Base peak (100%) | Intense (50-99%) | Present (10-49%) | Weak (1-10%) | Traces (1%) | Not seen |
| Target.in (+ or -) | 5                | 4                | 3                | 2            | 1           | 0        |

A factor [Product.LT] representing both the laser power applied and the presence of target compounds was calculated by summing the multiplications of Target.in(+) by Laser(+) and Target.in(-) by Laser(-).

The number of target compounds obtained as a base peak, in positive, negative or in both, without redundancy is specified with the factor Target.BP:

|          | Target.BP(-) | Target.BP(+) | Target.BP |
|----------|--------------|--------------|-----------|
| DCTB     | 3            | 3            | 5         |
| HCCA     | 0            | 1            | 1         |
| 9-AA     | 3            | 0            | 3         |
| <b>8</b> | 3            | 1            | 3         |
| <b>9</b> | 3            | 0            | 3         |

## Experiments overview tables

### For the matrix DCTB

| #+ | #-  | Product | Matrix | Solvent                         | Laser(+) | Laser(-) | Target.in(+) | Target.in(-) | Product.LT |
|----|-----|---------|--------|---------------------------------|----------|----------|--------------|--------------|------------|
| 1  | 91  | 1       | DCTB   | CH <sub>2</sub> Cl <sub>2</sub> | 5        | 5        | 0            | 0            | 0          |
| 6  | 96  | 1       | DCTB   | MeOH                            | 5        | 5        | 0            | 0            | 0          |
| 11 | 101 | 2       | DCTB   | CH <sub>2</sub> Cl <sub>2</sub> | 6        | 5        | 3            | 1            | 23         |
| 16 | 106 | 2       | DCTB   | MeOH                            | 5        | 5        | 0            | 2            | 10         |
| 21 | 111 | 3       | DCTB   | CH <sub>2</sub> Cl <sub>2</sub> | 5        | 4        | 5            | 5            | 45         |
| 26 | 116 | 3       | DCTB   | MeOH                            | 5        | 5        | 4            | 5            | 45         |
| 31 | 121 | 4       | DCTB   | CH <sub>2</sub> Cl <sub>2</sub> | 6        | 4        | 2            | 0            | 12         |
| 36 | 126 | 4       | DCTB   | MeOH                            | 5        | 4        | 4            | 0            | 20         |
| 41 | 131 | 5       | DCTB   | CH <sub>2</sub> Cl <sub>2</sub> | 6        | 4        | 3            | 1            | 22         |
| 46 | 136 | 5       | DCTB   | MeOH                            | 5        | 4        | 0            | 0            | 0          |
| 51 | 141 | 6       | DCTB   | CH <sub>2</sub> Cl <sub>2</sub> | 5        | 4        | 5            | 0            | 25         |
| 56 | 146 | 6       | DCTB   | MeOH                            | 5        | 4        | 4            | 0            | 20         |
| 61 | 151 | 7       | DCTB   | CH <sub>2</sub> Cl <sub>2</sub> | 5        | 5        | 5            | 2            | 35         |
| 66 | 156 | 7       | DCTB   | MeOH                            | 5        | 5        | 4            | 2            | 30         |
| 71 | 161 | 8       | DCTB   | CH <sub>2</sub> Cl <sub>2</sub> | 6        | 5        | 0            | 5            | 25         |
| 76 | 166 | 8       | DCTB   | MeOH                            | 5        | 5        | 1            | 5            | 30         |
| 81 | 171 | 9       | DCTB   | CH <sub>2</sub> Cl <sub>2</sub> | 5        | 5        | 0            | 2            | 10         |
| 86 | 176 | 9       | DCTB   | MeOH                            | 5        | 5        | 0            | 5            | 25         |
|    |     |         |        | Average values                  | 5,22     | 4,61     | 2,22         | 1,94         | 20,94      |

### For the matrix HCCA

| #+ | #-  | Product | Matrix | Solvent                         | Laser(+) | Laser(-) | Target.in(+) | Target.in(-) | Product.LT |
|----|-----|---------|--------|---------------------------------|----------|----------|--------------|--------------|------------|
| 2  | 92  | 1       | HCCA   | CH <sub>2</sub> Cl <sub>2</sub> | 3        | 2        | 0            | 0            | 0          |
| 7  | 97  | 1       | HCCA   | MeOH                            | 3        | 4        | 0            | 0            | 0          |
| 12 | 102 | 2       | HCCA   | CH <sub>2</sub> Cl <sub>2</sub> | 3        | 3        | 4            | 0            | 12         |
| 17 | 107 | 2       | HCCA   | MeOH                            | 5        | 4        | 3            | 0            | 15         |
| 22 | 112 | 3       | HCCA   | CH <sub>2</sub> Cl <sub>2</sub> | 2        | 0        | 2            | 0            | 4          |
| 27 | 117 | 3       | HCCA   | MeOH                            | 4        | 5        | 2            | 1            | 13         |
| 32 | 122 | 4       | HCCA   | CH <sub>2</sub> Cl <sub>2</sub> | 5        | 1        | 2            | 0            | 10         |
| 37 | 127 | 4       | HCCA   | MeOH                            | 5        | 4        | 1            | 0            | 5          |
| 42 | 132 | 5       | HCCA   | CH <sub>2</sub> Cl <sub>2</sub> | 3        | 1        | 0            | 0            | 0          |
| 47 | 137 | 5       | HCCA   | MeOH                            | 5        | 4        | 0            | 0            | 0          |
| 52 | 142 | 6       | HCCA   | CH <sub>2</sub> Cl <sub>2</sub> | 4        | 2        | 0            | 0            | 0          |
| 57 | 147 | 6       | HCCA   | MeOH                            | 5        | 3        | 5            | 0            | 25         |
| 62 | 152 | 7       | HCCA   | CH <sub>2</sub> Cl <sub>2</sub> | 4        | 0        | 0            | 0            | 0          |
| 67 | 157 | 7       | HCCA   | MeOH                            | 4        | 4        | 0            | 0            | 0          |
| 72 | 162 | 8       | HCCA   | CH <sub>2</sub> Cl <sub>2</sub> | 2        | 0        | 0            | 0            | 0          |
| 77 | 167 | 8       | HCCA   | MeOH                            | 5        | 3        | 2            | 4            | 22         |
| 82 | 172 | 9       | HCCA   | CH <sub>2</sub> Cl <sub>2</sub> | 5        | 4        | 0            | 0            | 0          |
| 87 | 177 | 9       | HCCA   | MeOH                            | 5        | 4        | 0            | 2            | 8          |
|    |     |         |        | Average values                  | 4,00     | 2,67     | 1,17         | 0,39         | 6,33       |



For the matrix 9-AA

| #+ | #-  | Product | Matrix | Solvent                         | Laser(+) | Laser(-) | Target.in(+) | Target.in(-) | Product.LT |
|----|-----|---------|--------|---------------------------------|----------|----------|--------------|--------------|------------|
| 3  | 93  | 1       | 9-AA   | CH <sub>2</sub> Cl <sub>2</sub> | 3        | 3        | 0            | 1            | 3          |
| 8  | 98  | 1       | 9-AA   | MeOH                            | 3        | 2        | 0            | 1            | 2          |
| 13 | 103 | 2       | 9-AA   | CH <sub>2</sub> Cl <sub>2</sub> | 4        | 1        | 0            | 0            | 0          |
| 18 | 108 | 2       | 9-AA   | MeOH                            | 3        | 2        | 0            | 2            | 4          |
| 23 | 113 | 3       | 9-AA   | CH <sub>2</sub> Cl <sub>2</sub> | 4        | 3        | 2            | 5            | 23         |
| 28 | 118 | 3       | 9-AA   | MeOH                            | 3        | 2        | 1            | 5            | 13         |
| 33 | 123 | 4       | 9-AA   | CH <sub>2</sub> Cl <sub>2</sub> | 3        | 1        | 0            | 1            | 1          |
| 38 | 128 | 4       | 9-AA   | MeOH                            | 4        | 1        | 0            | 0            | 0          |
| 43 | 133 | 5       | 9-AA   | CH <sub>2</sub> Cl <sub>2</sub> | 3        | 2        | 0            | 4            | 8          |
| 48 | 138 | 5       | 9-AA   | MeOH                            | 3        | 2        | 0            | 2            | 4          |
| 53 | 143 | 6       | 9-AA   | CH <sub>2</sub> Cl <sub>2</sub> | 3        | 1        | 0            | 0            | 0          |
| 58 | 148 | 6       | 9-AA   | MeOH                            | 2        | 1        | 0            | 0            | 0          |
| 63 | 153 | 7       | 9-AA   | CH <sub>2</sub> Cl <sub>2</sub> | 3        | 2        | 0            | 0            | 0          |
| 68 | 158 | 7       | 9-AA   | MeOH                            | 3        | 2        | 3            | 0            | 9          |
| 73 | 163 | 8       | 9-AA   | CH <sub>2</sub> Cl <sub>2</sub> | 4        | 1        | 0            | 2            | 2          |
| 78 | 168 | 8       | 9-AA   | MeOH                            | 4        | 1        | 0            | 5            | 5          |
| 83 | 173 | 9       | 9-AA   | CH <sub>2</sub> Cl <sub>2</sub> | 4        | 2        | 0            | 5            | 10         |
| 88 | 178 | 9       | 9-AA   | MeOH                            | 4        | 3        | 0            | 5            | 15         |
|    |     |         |        | Average values                  | 3,33     | 1,78     | 0,33         | 2,11         | 5,50       |

For the matrix 8

| #+ | #-  | Product | Matrix   | Solvent                         | Laser(+) | Laser(-) | Target.in(+) | Target.in(-) | Product.LT |
|----|-----|---------|----------|---------------------------------|----------|----------|--------------|--------------|------------|
| 4  | 94  | 1       | <b>8</b> | CH <sub>2</sub> Cl <sub>2</sub> | 4        | 2        | 0            | 0            | 0          |
| 9  | 99  | 1       | <b>8</b> | MeOH                            | 3        | 2        | 0            | 0            | 0          |
| 14 | 104 | 2       | <b>8</b> | CH <sub>2</sub> Cl <sub>2</sub> | 2        | 2        | 0            | 0            | 0          |
| 19 | 109 | 2       | <b>8</b> | MeOH                            | 3        | 3        | 0            | 0            | 0          |
| 24 | 114 | 3       | <b>8</b> | CH <sub>2</sub> Cl <sub>2</sub> | 3        | 1        | 5            | 3            | 18         |
| 29 | 119 | 3       | <b>8</b> | MeOH                            | 3        | 2        | 1            | 5            | 13         |
| 34 | 124 | 4       | <b>8</b> | CH <sub>2</sub> Cl <sub>2</sub> | 3        | 1        | 0            | 0            | 0          |
| 39 | 129 | 4       | <b>8</b> | MeOH                            | 4        | 2        | 0            | 0            | 0          |
| 44 | 134 | 5       | <b>8</b> | CH <sub>2</sub> Cl <sub>2</sub> | 3        | 3        | 0            | 4            | 12         |
| 49 | 139 | 5       | <b>8</b> | MeOH                            | 3        | 2        | 0            | 2            | 4          |
| 54 | 144 | 6       | <b>8</b> | CH <sub>2</sub> Cl <sub>2</sub> | 3        | 2        | 0            | 0            | 0          |
| 59 | 149 | 6       | <b>8</b> | MeOH                            | 3        | 1        | 0            | 0            | 0          |
| 64 | 154 | 7       | <b>8</b> | CH <sub>2</sub> Cl <sub>2</sub> | 3        | 2        | 0            | 0            | 0          |
| 69 | 159 | 7       | <b>8</b> | MeOH                            | 3        | 1        | 0            | 0            | 0          |
| 74 | 164 | 8       | <b>8</b> | CH <sub>2</sub> Cl <sub>2</sub> | 4        | 1        | 0            | 5            | 5          |
| 79 | 169 | 8       | <b>8</b> | MeOH                            | 3        | 1        | 0            | 4            | 4          |
| 84 | 174 | 9       | <b>8</b> | CH <sub>2</sub> Cl <sub>2</sub> | 3        | 2        | 0            | 5            | 10         |
| 89 | 179 | 9       | <b>8</b> | MeOH                            | 3        | 2        | 0            | 4            | 8          |
|    |     |         |          | Average values                  | 3,11     | 1,78     | 0,33         | 1,78         | 4,11       |

For the matrix **9**

| #+ | #-  | Product | Matrix   | Solvent                         | Laser(+) | Laser(-) | Target.in(+) | Target.in(-) | Product.LT |
|----|-----|---------|----------|---------------------------------|----------|----------|--------------|--------------|------------|
| 5  | 95  | 1       | <b>9</b> | CH <sub>2</sub> Cl <sub>2</sub> | 3        | 3        | 0            | 1            | 3          |
| 10 | 100 | 1       | <b>9</b> | MeOH                            | 3        | 1        | 0            | 1            | 1          |
| 15 | 105 | 2       | <b>9</b> | CH <sub>2</sub> Cl <sub>2</sub> | 3        | 2        | 0            | 0            | 0          |
| 20 | 110 | 2       | <b>9</b> | MeOH                            | 3        | 3        | 0            | 0            | 0          |
| 25 | 115 | 3       | <b>9</b> | CH <sub>2</sub> Cl <sub>2</sub> | 3        | 2        | 4            | 5            | 22         |
| 30 | 120 | 3       | <b>9</b> | MeOH                            | 3        | 2        | 4            | 5            | 22         |
| 35 | 125 | 4       | <b>9</b> | CH <sub>2</sub> Cl <sub>2</sub> | 3        | 2        | 0            | 0            | 0          |
| 40 | 130 | 4       | <b>9</b> | MeOH                            | 4        | 2        | 0            | 0            | 0          |
| 45 | 135 | 5       | <b>9</b> | CH <sub>2</sub> Cl <sub>2</sub> | 3        | 2        | 0            | 0            | 0          |
| 50 | 140 | 5       | <b>9</b> | MeOH                            | 3        | 2        | 0            | 2            | 4          |
| 55 | 145 | 6       | <b>9</b> | CH <sub>2</sub> Cl <sub>2</sub> | 3        | 2        | 0            | 0            | 0          |
| 60 | 150 | 6       | <b>9</b> | MeOH                            | 3        | 1        | 0            | 0            | 0          |
| 65 | 155 | 7       | <b>9</b> | CH <sub>2</sub> Cl <sub>2</sub> | 3        | 2        | 0            | 0            | 0          |
| 70 | 160 | 7       | <b>9</b> | MeOH                            | 3        | 2        | 0            | 0            | 0          |
| 75 | 165 | 8       | <b>9</b> | CH <sub>2</sub> Cl <sub>2</sub> | 4        | 1        | 0            | 0            | 0          |
| 80 | 170 | 8       | <b>9</b> | MeOH                            | 3        | 3        | 0            | 5            | 15         |
| 85 | 175 | 9       | <b>9</b> | CH <sub>2</sub> Cl <sub>2</sub> | 4        | 3        | 0            | 5            | 15         |
| 90 | 180 | 9       | <b>9</b> | MeOH                            | 3        | 4        | 0            | 5            | 20         |
|    |     |         |          | Average values                  | 3,17     | 2,17     | 0,44         | 1,61         | 5,67       |

The average values as a percentage are summarized in order to generate the Kiviat's diagram.

|          | Product.LT | Laser(+) | Target.in(+) | Target.BP(+) | Target.BP | Target.BP(-) | Target.in(-) |
|----------|------------|----------|--------------|--------------|-----------|--------------|--------------|
| DCTB     | 34,9       | 87,0     | 44,4         | 33,3         | 55,6      | 33,3         | 38,8         |
| HCCA     | 10,6       | 66,7     | 23,2         | 11,1         | 11,1      | 0,0          | 7,8          |
| 9-AA     | 9,2        | 55,5     | 6,6          | 0,0          | 33,3      | 33,3         | 42,2         |
| <b>8</b> | 6,9        | 51,8     | 6,6          | 11,1         | 33,3      | 33,3         | 35,6         |
| <b>9</b> | 9,5        | 52,8     | 8,8          | 0,0          | 33,3      | 33,3         | 32,2         |

### Qualitative analysis of the five matrices

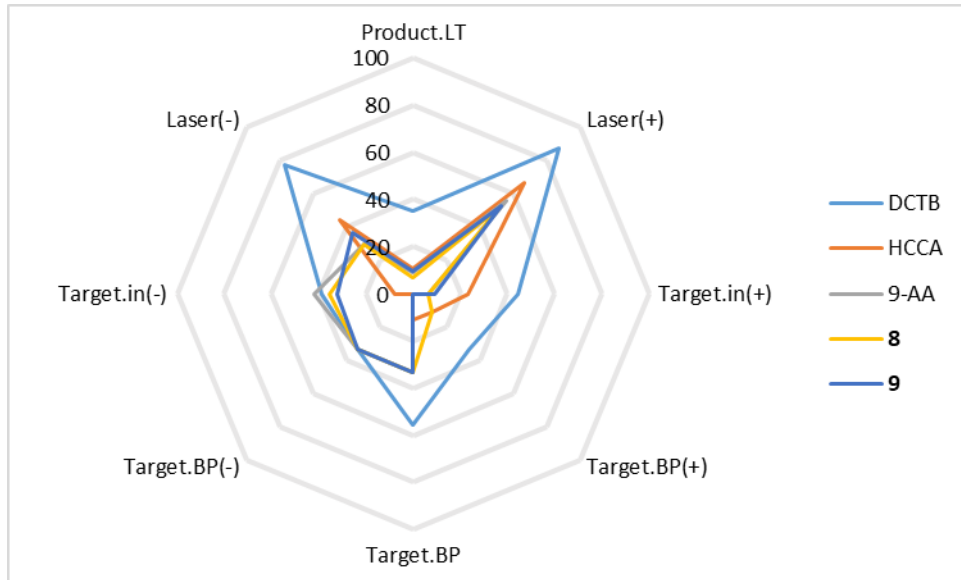

### Qualitative analysis of DCTB vs. HCCA

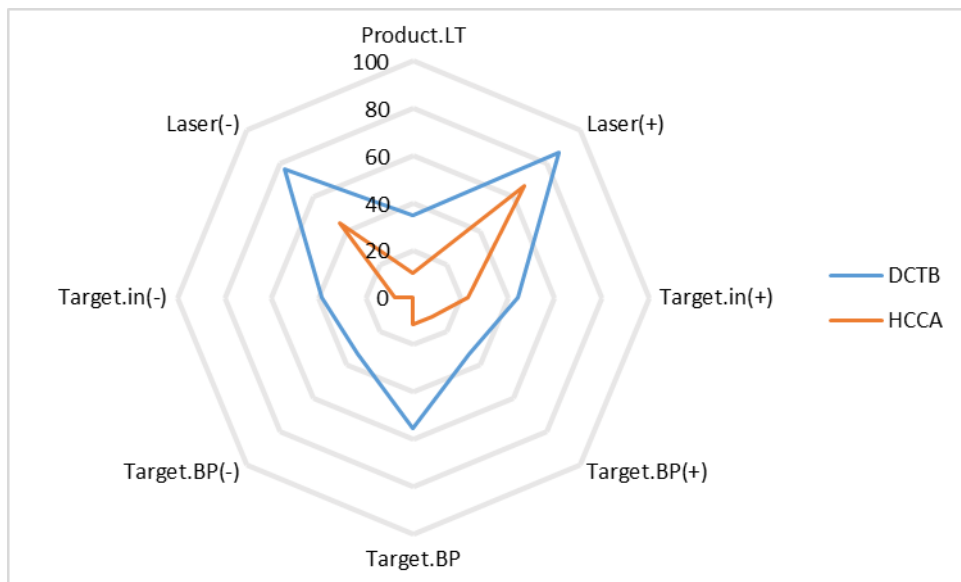

### Qualitative analysis of DCTB vs. 9-AA

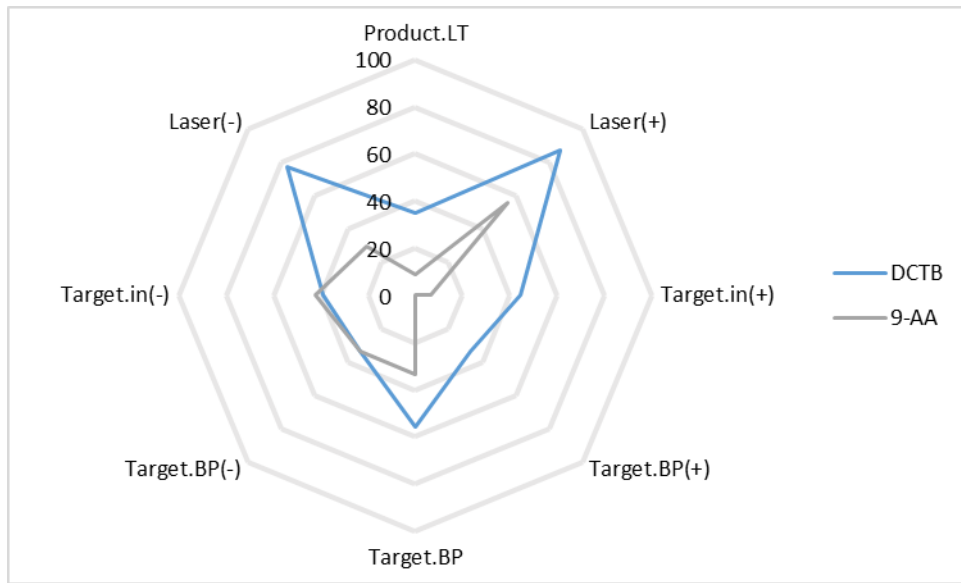

### Qualitative analysis of 9-AA, 8 and 9

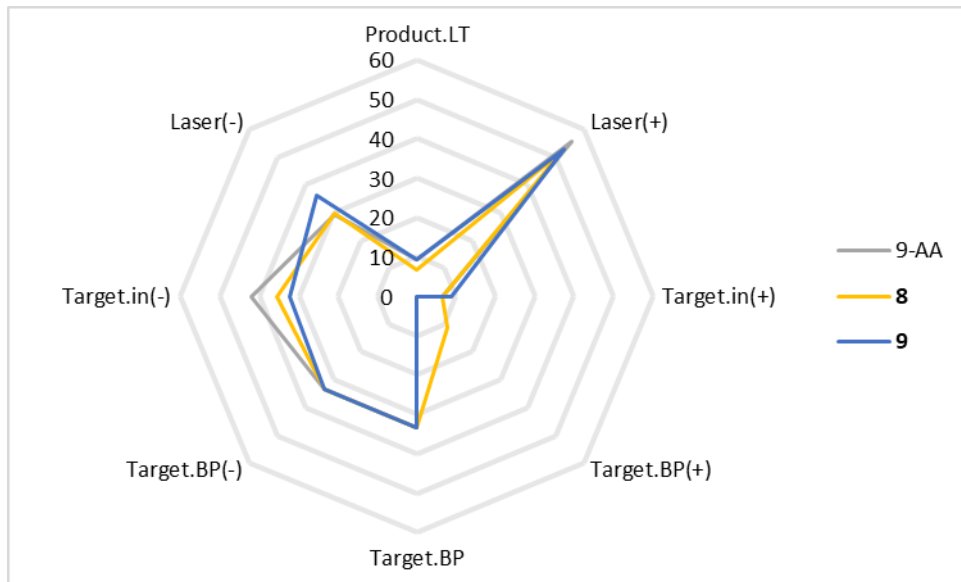

## References and Notes

1. Gottlieb, H. E.; Kotlyar, V.; Nudelman, A. *J. Org. Chem.* **1997**, *62*, 7512-7515.
2. Vogel, A. I.; Tatchell, A. R.; Furnis, B. S.; Hannaford, A. J.; Smith, P. W. G. *Vogel's textbook of practical organic chemistry, 5th edn*, Prentice Hall, 1996.
3. Nandy, R.; Sankararaman, S. *Org. Biomol. Chem.* **2010**, *8*, 2260-2266.
4. Zhang, C.; De, C. K.; Seidel, D. *Org. Synth.* **2012**, *89*, 274-282.
5. Borovlev, I. V.; Demidov, O. P.; Amangasieva, G. A.; Avakyan, E. K. *Tetrahedron Lett.* **2016**, *57*, 3608-3611.
6. Sheldrick, G. M. *Acta Crystallogr., Sect. A* **2015**, *71*, 3-8.
7. Sheldrick, G. M. *Acta Crystallogr., Sect. C* **2015**, *71*, 3-8.
8. Farrugia, L. J. *J. Appl. Crystallogr.* **1997**, *30*, 565.
9. Bouarfa, S.; Bentabed-Ababsa, G.; Erb, W.; Picot, L.; Thiery, V.; Roisnel, T.; Dorcet, V.; Mongin, F. *Synthesis* **2021**, *53*, 1271-1284.
10. Bertrand, H.; Guillot, R.; Teulade-Fichou, M.-P.; Fichou, D. *Chem. Eur. J.* **2013**, *19*, 14654-14664.
